# Supplementary material
Source: publisher site journal article supplement (https://www.dovepress.com/article/490836)
Supplement: Supplementary file 1 [file get_supplementary_file.php]

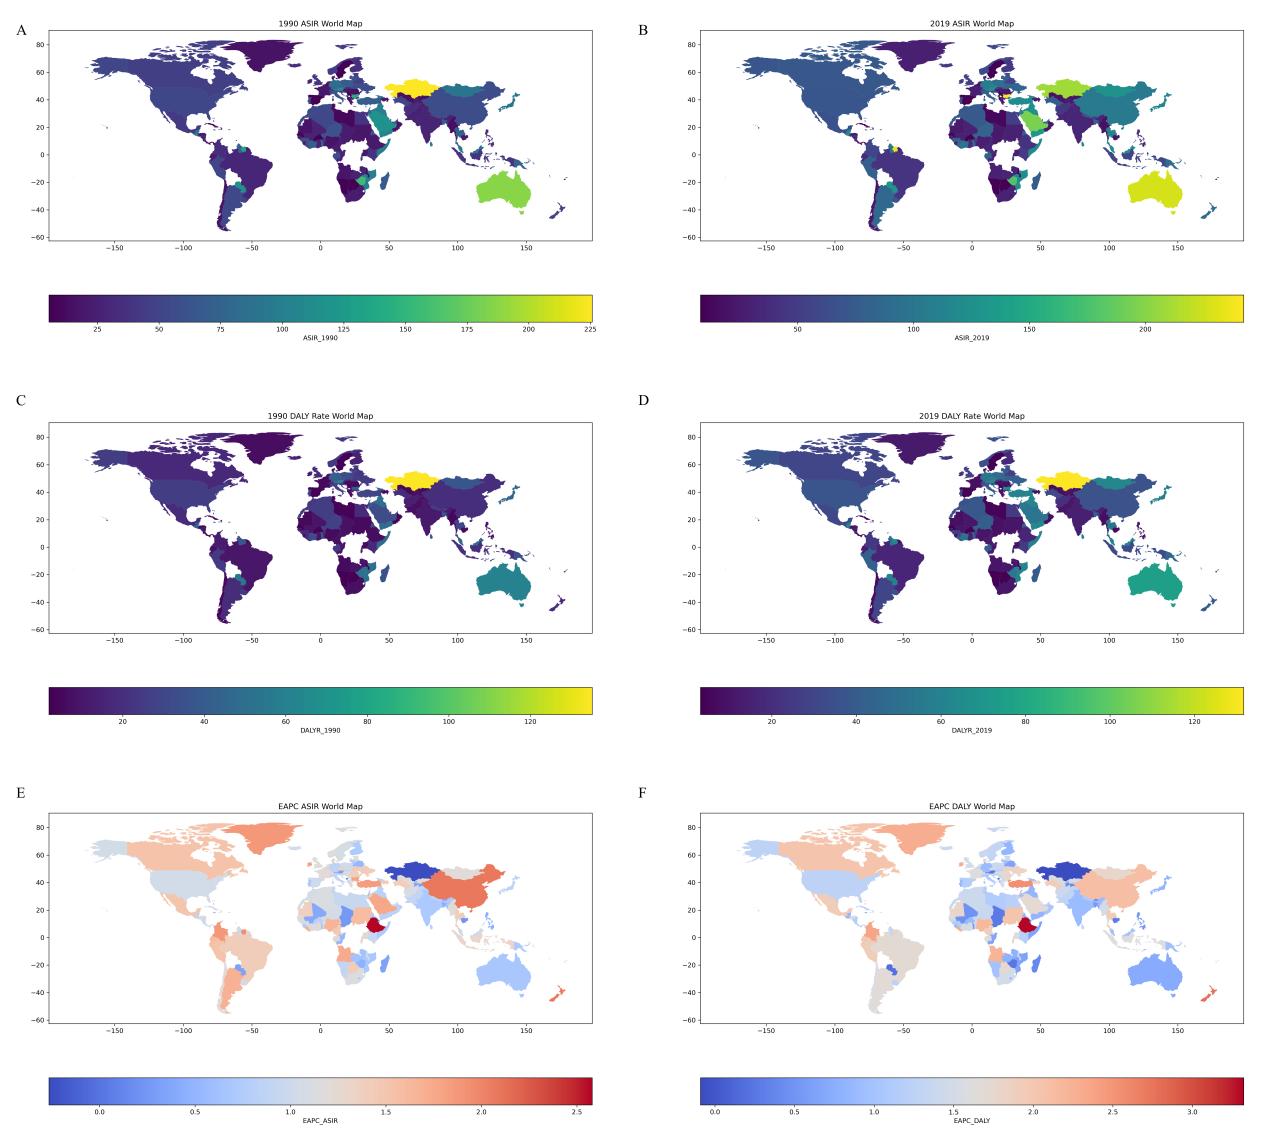


**Figure S1.** Global Disparities in PCOS from 1990 to 2019 in Female. (A) ASIR in 1990. (B) ASIR in 2019. (C) Age-Standardized DALY Rate in 1990. (D) Age-Standardized DALY Rate in 2019. (E) EAPCs in ASIR from 1990 to 2019. (F) EAPCs in Age-Standardized DALY Rate from 1990 to 2019. DALY = Disability-Adjusted Life-Year; ASIR = Age-Standardized Incidence Rate; EAPCs = Estimated Annual Percentage Changes. PCOS= polycystic ovary syndrome.


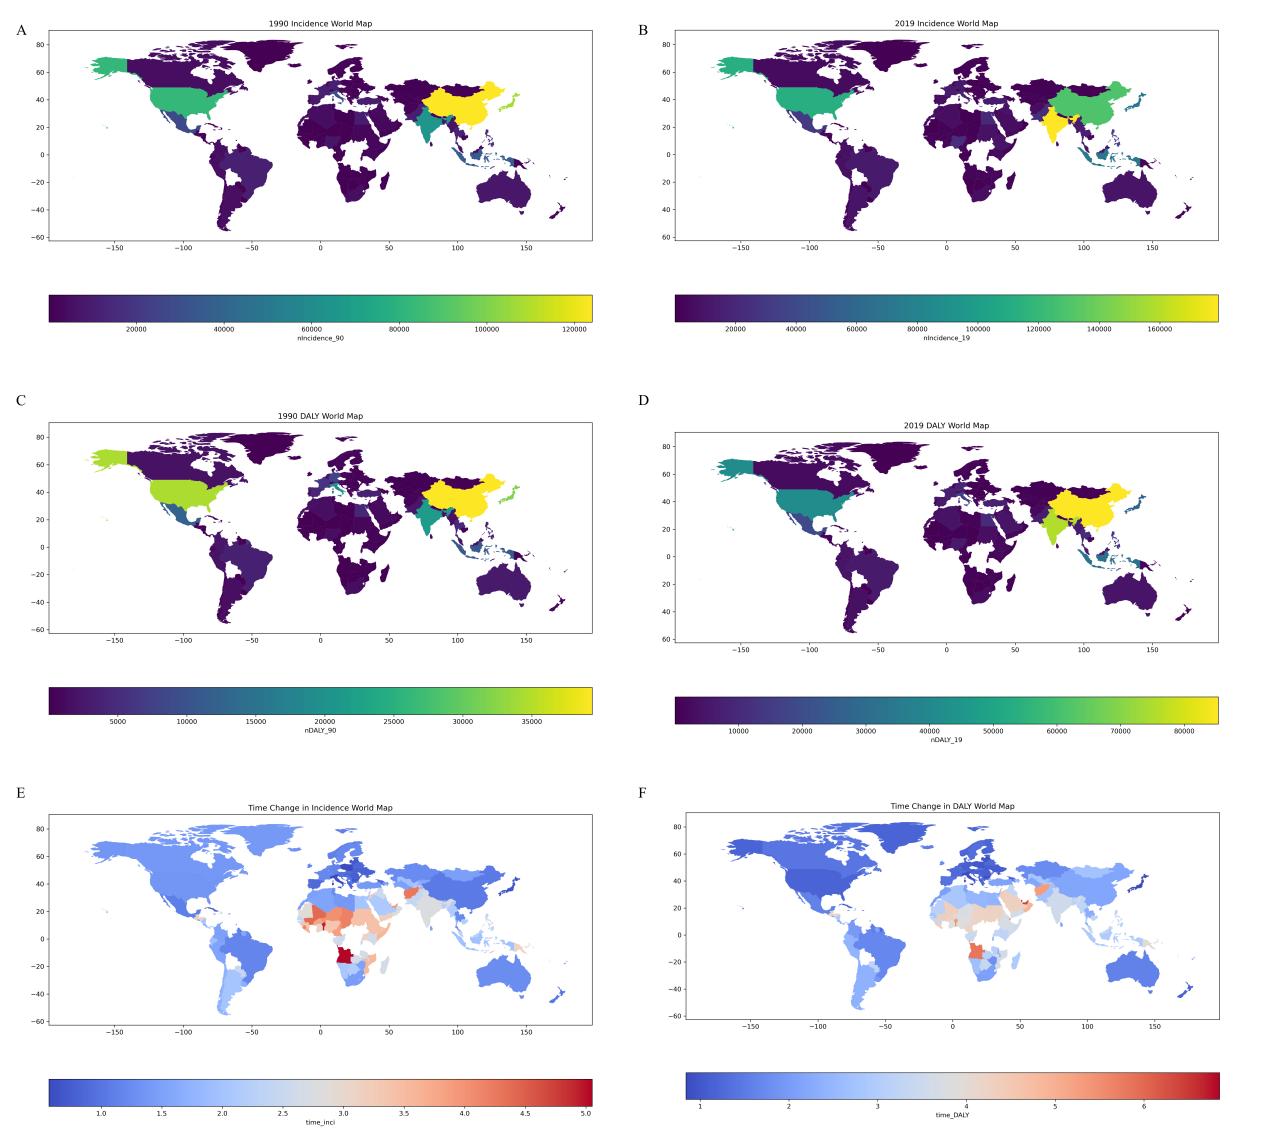


**Figure S2.** Global Disparities in PCOS from 1990 to 2019 in Female. (A) Incidence in 1990. (B) Incidence in 2019. (C) DALY in 1990. (D) DALY in 2019. (E) Time change in Incidence from 1990 to 2019. (F) Time change in DALY from 1990 to 2019. DALY = Disability-Adjusted Life-Year. PCOS= polycystic ovary syndrome.

**Table S1. Numbers of DALY and Incidence of PCOS in women of reproductive age in 1990 and 2019 by regions.**

| location_number | Numbers of DALY in 1990 | Numbers of DALY in 2019 | Numbers of Incidencein 1990 | Numbers of Incidencein 2019 | time_DALY | time_incidence |
| --- | --- | --- | --- | --- | --- | --- |
| High SDI | 108610.97 | 130758.84 | 275947.89 | 286375.16 | 1.20 | 1.04 |
| High-middle SDI | 59102.91 | 101500.63 | 135082.81 | 158842.60 | 1.72 | 1.18 |
| Middle SDI | 84120.84 | 204203.26 | 245448.14 | 380578.79 | 2.43 | 1.55 |
| Low-middle SDI | 26871.49 | 81707.06 | 92849.67 | 213582.16 | 3.04 | 2.30 |
| Low SDI | 8646.92 | 29233.85 | 34093.81 | 106177.85 | 3.38 | 3.11 |
| Andean Latin America | 3528.27 | 8776.08 | 8525.92 | 14793.55 | 2.49 | 1.74 |
| Australasia | 3533.78 | 5280.72 | 9718.64 | 11679.94 | 1.49 | 1.20 |
| Caribbean | 1690.16 | 2815.21 | 4092.83 | 5263.20 | 1.67 | 1.29 |
| Central Asia | 872.69 | 1901.02 | 2667.37 | 4123.96 | 2.18 | 1.55 |
| Central Europe | 878.68 | 947.03 | 2200.95 | 1577.22 | 1.08 | 0.72 |
| Central Latin America | 17347.39 | 31276.53 | 39235.01 | 50620.85 | 1.80 | 1.29 |
| Central Sub-Saharan Africa | 760.69 | 3012.64 | 3130.00 | 11154.45 | 3.96 | 3.56 |
| East Asia | 41433.56 | 88671.78 | 128926.68 | 134097.56 | 2.14 | 1.04 |
| Eastern Europe | 1711.81 | 2125.65 | 5457.11 | 4983.36 | 1.24 | 0.91 |
| Eastern Sub-Saharan Africa | 3112.57 | 9837.61 | 13345.72 | 38468.86 | 3.16 | 2.88 |
| High-income Asia Pacific | 36241.07 | 34694.72 | 124433.73 | 88832.49 | 0.96 | 0.71 |
| High-income North America | 36227.11 | 43503.91 | 86599.61 | 118049.50 | 1.20 | 1.36 |
| North Africa and Middle East | 21019.14 | 56978.65 | 57110.15 | 105439.37 | 2.71 | 1.85 |
| Oceania | 304.13 | 939.06 | 885.37 | 2202.60 | 3.09 | 2.49 |
| South Asia | 25518.76 | 87361.58 | 81041.31 | 217992.29 | 3.42 | 2.69 |
| Southeast Asia | 27872.94 | 81642.72 | 89129.05 | 170592.94 | 2.93 | 1.91 |
| Southern Latin America | 2291.36 | 5354.62 | 7173.88 | 13624.55 | 2.34 | 1.90 |
| Southern Sub-Saharan Africa | 1773.67 | 3682.72 | 6374.77 | 9551.10 | 2.08 | 1.50 |
| Tropical Latin America | 3489.04 | 5912.87 | 10853.40 | 12903.26 | 1.69 | 1.19 |
| Western Europe | 54904.45 | 61306.31 | 89975.47 | 85722.63 | 1.12 | 0.95 |
| Western Sub-Saharan Africa | 3015.09 | 11749.19 | 12974.78 | 44604.48 | 3.90 | 3.44 |
| Global | 287526.34 | 547770.63 | 783851.74 | 1146278.17 | 1.91 | 1.46 |

**Table S2. The Top and Bottom three regions of PCOS in women of reproductive age in 2019 and trends from 1990 to 2019.**

| Measure | Top three regions |  |  | Bottom three regions |  |  |
| --- | --- | --- | --- | --- | --- | --- |
| 2019 ASR (per 100,000 people) |  |  |  |  |  |  |
| Age-standardized DALY rate | Western Europe(65.30) | Australasia(77.41) | High-income Asia Pacific(87.74) | Central Europe(3.68) | Eastern Europe(4.23) | Central Asia(7.77) |
| ASIR | High-income North America(170.75) | Australasia(231.97) | High-income Asia Pacific(343.45) | Central Europe(8.72) | Eastern Europe(14.21) | Central Asia(19.36) |
| 1990-2019 increase times |  |  |  |  |  |  |
| DALY (cases) | South Asia(3.42) | Western sub-Saharan Africa(3.90) | Central sub-Saharan Africa(3.96) | High-income Asia Pacific(0.96) | Central Europe(1.08) | Western Europe(1.12) |
| Incidence (case) | Eastern Sub-Saharan Africa(2.88) | Western sub-Saharan Africa(3.44) | Central sub-Saharan Africa(3.56) | High-income Asia Pacific(0.71) | Central Europe(0.72) | Eastern Europe(0.91) |
| EAPC |  |  |  |  |  |  |
| DALY | East Asia(2.36) | South Asia(2.36) | Southeast Asia(2.56) | High-income North America(-0.77) | Central Latin America(-0.12) | Tropical Latin America(-0.09) |
| Incidence | East Asia(1.76) | South Asia(1.88) | Southeast Asia(1.98) | High-income North America(-1.13) | Tropical Latin America(-0.44) | Central Latin America(-0.17) |

Table S3. Incidence of PCOS in women of reproductive age in 1990 and 2019 for female and all nations.

| Incidence | Incidence No.(95%UI) |  |  | ASIR (per 100000) No.95%UI) |  |  |
| --- | --- | --- | --- | --- | --- | --- |
| nation | 1990 | 2019 | 1990-2019 EAPC No.(95%CI) | 1990 | 2019 | 1990-2019 EAPC No.(95%CI) |
| Afghanistan | 1319.70(830.23,1960.90) | 5643.05(3573.27,8467.42) | 6.11(5.40,6.83) | 33.44(31.62,35.39) | 45.88(44.68,47.11) | 1.59(1.29,1.89) |
| Albania | 57.59(34.53,87.52) | 45.65(28.03,66.37) | -0.75(-1.07,-0.43) | 6.08(4.61,7.98) | 7.99(5.84,10.69) | 0.91(0.84,0.98) |
| Algeria | 4291.27(2617.69,6690.22) | 6634.57(4200.73,10154.88) | 1.49(1.04,1.94) | 53.39(51.80,55.04) | 73.68(71.92,75.48) | 1.27(1.22,1.32) |
| American Samoa | 9.75(6.10,15.33) | 15.83(9.97,23.93) | 1.56(1.33,1.80) | 69.41(32.87,140.34) | 90.91(51.71,154.46) | 0.78(0.59,0.98) |
| Andorra | 10.76(6.97,16.32) | 14.77(9.45,22.36) | 0.95(0.72,1.18) | 94.29(46.58,170.05) | 120.06(66.76,199.04) | 0.73(0.59,0.87) |
| Angola | 528.41(335.32,774.90) | 2669.56(1654.65,4078.36) | 5.52(5.32,5.72) | 17.96(16.45,19.62) | 29.59(28.48,30.76) | 1.57(1.41,1.73) |
| Antigua and Barbuda | 6.50(4.14,9.86) | 10.00(6.38,14.43) | 1.54(1.28,1.79) | 38.21(14.70,86.39) | 49.19(23.56,90.65) | 0.72(0.66,0.79) |
| Argentina | 4565.41(2789.48,6977.94) | 9166.28(5625.25,13838.55) | 2.25(1.96,2.55) | 53.27(51.74,54.84) | 86.52(84.76,88.31) | 1.60(1.38,1.82) |
| Armenia | 112.62(72.02,165.70) | 101.37(65.16,148.18) | -0.31(-0.93,0.32) | 13.30(10.95,16.09) | 19.80(16.07,24.16) | 1.43(1.38,1.48) |
| Australia | 7560.38(4278.55,11983.88) | 9496.37(5729.65,14897.66) | 0.77(0.58,0.96) | 186.36(182.18,190.61) | 227.25(222.70,231.87) | 0.33(0.12,0.54) |
| Austria | 1780.20(1167.87,2731.80) | 1654.70(1065.51,2560.14) | -0.07(-0.24,0.10) | 115.14(109.85,120.63) | 126.79(120.74,133.06) | 0.09(-0.02,0.19) |
| Azerbaijan | 274.09(170.54,406.56) | 416.24(266.70,612.64) | 1.97(1.49,2.45) | 13.48(11.92,15.24) | 20.39(18.46,22.48) | 1.53(1.44,1.63) |
| Commonwealth of the Bahamas | 37.56(24.07,57.12) | 51.17(32.85,77.13) | 1.31(1.18,1.45) | 46.78(33.02,65.33) | 55.19(41.11,72.56) | 0.52(0.45,0.58) |
| Bahrain | 78.74(50.18,120.10) | 200.06(126.14,305.40) | 3.31(3.01,3.60) | 70.03(55.39,88.52) | 79.55(68.88,91.41) | 0.37(0.34,0.40) |
| Bangladesh | 5575.43(3459.36,8209.57) | 12230.59(7701.33,18308.41) | 2.91(2.76,3.06) | 16.76(16.32,17.22) | 25.96(25.50,26.42) | 1.75(1.59,1.91) |
| Barbados | 30.95(19.69,47.36) | 31.72(20.67,47.54) | 0.19(0.04,0.34) | 46.23(31.40,66.15) | 53.84(36.74,76.17) | 0.44(0.40,0.48) |
| Belarus | 215.95(135.78,316.07) | 184.95(118.45,262.69) | -0.68(-1.07,-0.29) | 9.39(8.17,10.74) | 12.59(10.79,14.60) | 1.03(0.97,1.09) |
| Belgium | 1923.18(1225.63,2925.79) | 2219.60(1401.78,3473.35) | 0.64(0.41,0.87) | 98.30(93.95,102.79) | 120.77(115.79,125.91) | 0.58(0.35,0.82) |
| Belize | 23.08(14.77,36.07) | 70.81(45.56,107.74) | 3.80(3.53,4.07) | 38.39(24.25,62.66) | 53.24(41.55,67.54) | 0.95(0.70,1.19) |
| Benin | 271.67(168.31,399.03) | 1341.22(842.68,2060.45) | 5.62(5.33,5.91) | 20.34(17.98,23.01) | 33.83(32.04,35.74) | 1.70(1.45,1.95) |
| Bermuda | 6.65(4.35,10.13) | 5.64(3.68,8.37) | -0.37(-0.56,-0.18) | 54.62(21.17,115.44) | 60.04(21.05,134.50) | 0.25(0.20,0.31) |
| Bhutan | 43.71(27.07,66.77) | 79.21(50.60,121.50) | 2.70(2.39,3.01) | 22.98(16.60,32.00) | 38.19(30.24,47.76) | 1.96(1.86,2.06) |
| Plurinational State of Bolivia | 1252.94(814.35,1810.64) | 2645.56(1736.86,3873.15) | 2.65(2.41,2.90) | 64.13(60.62,67.83) | 83.83(80.67,87.10) | 0.88(0.84,0.92) |
| Bosnia and Herzegovina | 61.24(36.30,91.00) | 46.53(28.99,67.62) | -0.35(-0.81,0.11) | 5.29(4.05,6.81) | 7.99(5.84,10.67) | 1.58(1.38,1.77) |
| Botswana | 128.56(80.00,193.89) | 276.05(173.37,417.54) | 2.80(2.42,3.18) | 28.81(24.00,34.71) | 43.20(38.25,48.65) | 1.70(1.56,1.84) |
| Brazil | 10675.59(6963.86,15682.46) | 12465.34(8325.86,18087.78) | -0.15(-0.42,0.12) | 23.82(23.37,24.28) | 24.70(24.26,25.13) | -0.49(-0.69,-0.29) |
| Brunei Darussalam | 101.67(58.76,155.98) | 245.94(143.13,379.27) | 3.21(2.72,3.69) | 143.60(117.04,176.03) | 242.43(213.07,274.72) | 1.79(1.57,2.01) |
| Bulgaria | 128.59(81.01,193.88) | 87.58(55.42,126.02) | -1.70(-1.93,-1.47) | 6.93(5.78,8.24) | 8.81(7.03,10.90) | 0.83(0.78,0.89) |
| Burkina Faso | 524.60(330.34,768.51) | 1997.33(1248.94,2988.83) | 4.47(4.24,4.70) | 19.38(17.74,21.16) | 28.88(27.62,30.20) | 1.17(0.97,1.37) |
| Burundi | 304.54(192.43,449.97) | 766.13(471.40,1131.33) | 3.45(3.26,3.64) | 19.47(17.33,21.89) | 20.78(19.31,22.36) | 0.13(0.07,0.18) |
| Republic of Cabo Verde | 23.13(14.37,34.35) | 49.66(30.79,74.52) | 2.72(2.04,3.42) | 21.83(13.76,35.27) | 33.27(24.66,44.15) | 1.31(1.10,1.52) |
| Cambodia | 1407.14(859.09,2119.04) | 3117.72(1935.64,4676.92) | 3.01(2.55,3.46) | 46.36(43.96,48.88) | 71.98(69.47,74.56) | 1.61(1.56,1.67) |
| Cameroon | 880.84(537.63,1354.45) | 3430.24(2101.81,5316.45) | 4.52(4.28,4.75) | 28.35(26.49,30.34) | 36.66(35.43,37.92) | 0.68(0.57,0.78) |
| Canada | 4049.92(2411.21,6215.56) | 5594.88(3343.18,8520.33) | 1.25(0.98,1.52) | 72.13(69.92,74.39) | 94.23(91.77,96.73) | 0.91(0.79,1.03) |
| Central African Republic | 181.54(111.62,273.76) | 411.90(256.48,600.29) | 2.63(2.38,2.87) | 22.52(19.34,26.19) | 24.28(21.97,26.82) | -0.02(-0.17,0.13) |
| Chad | 267.07(168.13,395.03) | 1116.04(677.30,1665.74) | 4.59(4.37,4.80) | 15.63(13.78,17.71) | 22.13(20.82,23.52) | 0.84(0.61,1.08) |
| Chile | 2191.70(1333.59,3386.29) | 3760.93(2245.80,5744.80) | 2.31(1.74,2.87) | 56.84(54.49,59.28) | 103.41(100.13,106.77) | 2.06(1.69,2.42) |
| China | 124043.31(78943.90,180597.37) | 129139.38(83528.19,193077.53) | 0.48(-0.27,1.24) | 33.92(33.74,34.11) | 58.12(57.79,58.44) | 1.79(1.52,2.07) |
| Colombia | 4767.89(3132.01,6942.36) | 7055.69(4658.33,9988.19) | 1.33(1.16,1.50) | 46.49(45.18,47.84) | 60.31(58.91,61.73) | 0.78(0.73,0.83) |
| Comoros | 39.64(23.87,61.15) | 66.08(41.07,100.55) | 1.52(1.35,1.68) | 27.14(19.27,38.29) | 31.52(24.37,40.30) | 0.28(0.12,0.45) |
| Congo | 189.56(116.22,286.61) | 486.08(297.34,726.01) | 2.90(2.63,3.17) | 24.26(20.89,28.22) | 32.01(29.22,35.01) | 0.81(0.67,0.95) |
| Cook Islands | 4.08(2.55,6.59) | 4.14(2.64,6.27) | 0.01(-0.17,0.19) | 71.18(19.64,211.65) | 98.10(27.51,251.61) | 1.02(0.86,1.18) |
| Costa Rica | 476.60(312.94,698.92) | 786.75(523.58,1121.57) | 1.69(1.25,2.14) | 54.75(49.94,60.00) | 72.11(67.15,77.34) | 0.82(0.75,0.88) |
| Croatia | 66.05(40.16,98.72) | 57.76(36.57,84.53) | -0.39(-0.51,-0.27) | 6.38(4.93,8.13) | 8.62(6.52,11.19) | 1.13(1.04,1.23) |
| Cuba | 1367.43(886.93,2155.48) | 1057.50(681.72,1589.33) | -0.23(-0.59,0.14) | 41.38(39.21,43.64) | 52.68(49.55,55.96) | 0.82(0.78,0.86) |
| Cyprus | 134.12(85.67,215.65) | 218.09(137.59,341.64) | 1.84(1.39,2.29) | 76.27(63.91,90.34) | 112.82(98.27,128.92) | 1.36(1.20,1.52) |
| Czech Republic | 157.85(95.83,235.09) | 129.12(78.94,190.18) | -1.12(-1.32,-0.91) | 6.49(5.51,7.59) | 8.51(7.08,10.16) | 0.88(0.82,0.94) |
| Republic of C么te d'Ivoire | 723.09(451.75,1063.36) | 2334.48(1435.32,3543.10) | 3.69(3.15,4.22) | 20.55(19.06,22.16) | 31.22(29.96,32.53) | 1.29(1.03,1.56) |
| Democratic People's Republic of Korea | 2005.67(1274.70,3007.55) | 1965.20(1249.97,2852.45) | 0.39(0.19,0.59) | 33.18(31.74,34.67) | 36.17(34.59,37.81) | 0.20(0.12,0.28) |
| Democratic Republic of the Congo | 2126.46(1307.29,3116.99) | 7192.06(4462.25,10553.06) | 4.24(4.01,4.46) | 19.25(18.44,20.11) | 26.45(25.83,27.07) | 0.99(0.80,1.18) |
| Denmark | 953.78(592.30,1506.82) | 1148.99(718.28,1794.65) | 1.00(0.74,1.27) | 88.63(83.09,94.44) | 114.34(107.82,121.16) | 0.79(0.64,0.94) |
| Djibouti | 30.46(18.12,45.37) | 96.83(60.12,146.52) | 4.30(3.91,4.69) | 21.92(14.76,32.84) | 34.86(28.25,42.60) | 1.68(1.56,1.79) |
| Dominica | 8.45(5.36,13.05) | 8.32(5.36,12.56) | 0.08(-0.07,0.22) | 38.30(16.92,81.03) | 50.20(22.10,98.61) | 0.78(0.68,0.89) |
| Dominican Republic | 838.11(530.43,1271.34) | 1456.14(927.79,2193.48) | 2.15(1.98,2.31) | 34.33(32.03,36.80) | 50.54(47.97,53.20) | 1.37(1.27,1.47) |
| Ecuador | 2583.65(1723.24,3691.68) | 4922.93(3315.18,6777.31) | 2.22(1.99,2.45) | 79.45(76.41,82.61) | 101.32(98.51,104.19) | 0.83(0.62,1.05) |
| Egypt | 10118.22(6336.25,16084.60) | 20364.56(12906.06,31141.64) | 2.22(1.94,2.51) | 62.45(61.24,63.69) | 76.99(75.94,78.06) | 0.60(0.54,0.66) |
| El Salvador | 824.32(548.09,1190.77) | 1122.95(749.11,1579.12) | 1.28(1.09,1.48) | 46.46(43.33,49.82) | 64.51(60.79,68.41) | 1.05(0.91,1.19) |
| Equatorial Guinea | 25.09(15.77,37.34) | 186.49(114.09,300.96) | 7.41(6.85,7.98) | 20.36(13.13,31.21) | 42.62(36.69,49.53) | 2.72(2.33,3.11) |
| Eritrea | 151.51(94.31,221.67) | 528.35(326.62,777.38) | 4.44(4.12,4.77) | 17.14(14.49,20.27) | 24.68(22.61,26.94) | 1.18(0.98,1.38) |
| Estonia | 32.74(20.82,47.99) | 27.30(17.51,39.30) | -0.65(-0.99,-0.30) | 9.85(6.75,13.88) | 13.79(9.04,20.20) | 1.28(1.21,1.34) |
| Kingdom of Eswatini | 98.90(62.16,152.97) | 159.52(101.40,239.78) | 1.27(0.67,1.86) | 36.26(29.40,44.89) | 44.76(38.07,52.56) | 0.45(0.20,0.69) |
| Ethiopia | 2783.47(1805.53,3992.87) | 9506.16(6028.12,13840.77) | 4.28(4.24,4.33) | 19.41(18.69,20.16) | 27.51(26.95,28.08) | 1.32(1.24,1.40) |
| Fiji | 126.64(78.77,198.47) | 179.19(114.84,273.98) | 0.88(0.57,1.19) | 56.42(47.02,67.45) | 80.51(69.16,93.21) | 1.07(0.92,1.23) |
| Finland | 796.39(504.91,1266.62) | 974.96(610.17,1488.08) | 0.56(0.34,0.79) | 88.86(82.78,95.27) | 112.43(105.48,119.73) | 0.78(0.68,0.88) |
| France | 10709.71(6746.85,16633.16) | 12689.49(8088.79,19926.13) | 0.64(0.54,0.73) | 82.65(81.10,84.24) | 105.70(103.87,107.55) | 0.75(0.68,0.83) |
| Gabon | 78.93(48.14,120.72) | 208.37(129.80,316.88) | 3.36(3.16,3.56) | 26.70(21.08,34.07) | 38.01(33.02,43.63) | 1.08(0.94,1.22) |
| Republic of the Gambia | 60.80(37.75,89.36) | 219.60(136.66,325.22) | 4.07(3.83,4.31) | 20.62(15.71,27.37) | 28.81(25.10,33.13) | 0.91(0.74,1.07) |
| Georgia | 202.72(128.37,306.39) | 157.92(100.74,240.89) | -0.78(-0.95,-0.60) | 16.00(13.87,18.37) | 27.43(23.29,32.11) | 2.04(1.85,2.23) |
| Germany | 11015.46(6899.24,17280.65) | 12435.40(7755.38,18949.34) | 0.31(0.02,0.59) | 84.68(83.10,86.29) | 105.63(103.78,107.51) | 0.60(0.52,0.68) |
| Ghana | 935.81(574.74,1382.80) | 2869.11(1769.41,4283.02) | 3.85(3.59,4.11) | 21.24(19.89,22.68) | 29.63(28.55,30.74) | 0.90(0.66,1.14) |
| Greece | 2179.09(1370.39,3383.79) | 1838.16(1160.43,2801.10) | -1.25(-1.60,-0.89) | 94.79(90.86,98.86) | 122.34(116.81,128.08) | 0.62(0.38,0.87) |
| Greenland | 6.38(3.91,9.75) | 8.95(5.32,13.55) | 1.88(1.39,2.36) | 60.27(22.80,129.12) | 82.66(37.67,157.36) | 1.14(1.05,1.24) |
| Grenada | 8.41(5.35,12.71) | 11.25(7.23,16.84) | 0.76(0.27,1.25) | 33.56(14.79,73.65) | 45.78(23.05,82.30) | 0.90(0.77,1.03) |
| Guam | 26.27(16.36,41.69) | 37.76(24.57,57.51) | 1.61(1.36,1.86) | 75.31(49.30,112.58) | 99.92(70.62,137.68) | 0.95(0.85,1.05) |
| Guatemala | 989.13(641.45,1482.76) | 3107.22(2070.86,4432.82) | 4.09(3.81,4.36) | 41.01(38.49,43.71) | 55.97(54.02,57.98) | 0.94(0.84,1.05) |
| Guinea | 312.52(196.87,454.37) | 1048.97(647.85,1563.25) | 4.00(3.76,4.25) | 18.82(16.78,21.08) | 26.61(25.01,28.31) | 1.01(0.88,1.15) |
| Guinea-Bissau | 57.83(36.16,84.27) | 161.73(101.22,241.50) | 3.44(3.04,3.84) | 18.86(14.27,24.96) | 26.63(22.66,31.30) | 1.00(0.74,1.26) |
| Guyana | 89.68(57.76,135.87) | 100.68(64.65,152.10) | 0.76(0.53,0.99) | 34.63(27.81,43.17) | 46.81(38.11,57.01) | 1.00(0.91,1.09) |
| Haiti | 512.24(328.14,756.56) | 1210.78(782.07,1823.00) | 2.89(2.60,3.18) | 26.97(24.68,29.48) | 33.10(31.26,35.03) | 0.73(0.70,0.76) |
| Honduras | 580.38(379.11,858.47) | 1803.67(1188.94,2572.82) | 4.03(3.79,4.26) | 39.31(36.16,42.76) | 57.17(54.56,59.89) | 1.27(1.18,1.37) |
| Hungary | 158.46(96.51,240.18) | 133.33(83.85,192.74) | -0.95(-1.13,-0.77) | 7.00(5.95,8.19) | 8.75(7.31,10.40) | 0.77(0.71,0.83) |
| Iceland | 60.00(38.04,95.25) | 79.54(49.94,126.85) | 1.13(0.95,1.30) | 97.63(74.50,125.87) | 124.10(98.32,154.58) | 0.83(0.75,0.91) |
| India | 64809.88(43243.64,92984.79) | 179301.96(116273.74,261690.26) | 3.91(3.78,4.04) | 27.81(27.60,28.03) | 46.87(46.65,47.09) | 2.05(1.88,2.21) |
| Indonesia | 36098.74(22778.24,54103.09) | 70897.21(45117.68,110621.85) | 2.34(2.26,2.43) | 62.06(61.42,62.70) | 105.71(104.93,106.49) | 2.07(1.97,2.17) |
| Islamic Republic of Iran | 10730.17(6814.78,16489.48) | 13015.98(8373.28,20100.58) | 0.87(-0.11,1.85) | 61.42(60.26,62.61) | 79.44(78.07,80.82) | 1.38(1.01,1.75) |
| Iraq | 3427.44(2154.49,5384.30) | 8656.81(5460.00,13186.44) | 3.64(3.47,3.81) | 61.62(59.57,63.76) | 67.85(66.42,69.30) | 0.51(0.39,0.64) |
| Ireland | 916.72(583.39,1406.09) | 1095.08(691.40,1694.86) | 0.23(0.04,0.41) | 91.46(85.63,97.61) | 117.16(110.31,124.32) | 0.75(0.62,0.89) |
| Israel | 1118.46(708.61,1722.18) | 2274.39(1405.89,3542.59) | 2.12(1.95,2.29) | 82.13(77.39,87.13) | 107.95(103.55,112.48) | 0.80(0.66,0.93) |
| Italy | 29025.18(19740.41,43354.80) | 17483.60(12121.03,25683.05) | -1.97(-2.23,-1.71) | 225.72(223.13,228.33) | 208.95(205.86,212.07) | -0.72(-0.90,-0.54) |
| Jamaica | 279.44(179.30,424.13) | 351.52(229.50,523.35) | 1.09(0.90,1.28) | 36.82(32.61,41.58) | 48.55(43.61,53.91) | 0.90(0.82,0.97) |
| Japan | 107620.74(60044.04,164961.98) | 71883.31(42553.51,109384.57) | -1.45(-1.60,-1.30) | 360.10(357.95,362.26) | 413.50(410.48,416.53) | 0.43(0.29,0.56) |
| Jordan | 738.10(456.21,1130.53) | 2358.88(1497.44,3570.31) | 4.17(3.89,4.44) | 57.56(53.45,62.06) | 70.60(67.78,73.52) | 0.86(0.78,0.93) |
| Kazakhstan | 619.84(393.39,920.14) | 766.29(486.29,1137.42) | 0.85(0.51,1.19) | 14.63(13.50,15.84) | 20.80(19.35,22.34) | 1.14(1.11,1.18) |
| Kenya | 2023.20(1290.19,3008.89) | 5297.74(3361.54,7838.54) | 3.09(2.94,3.23) | 27.55(26.34,28.83) | 32.08(31.21,32.97) | 0.40(0.32,0.47) |
| Kiribati | 10.25(6.47,15.39) | 22.74(14.41,35.24) | 2.76(2.30,3.21) | 48.99(23.71,95.48) | 68.70(43.42,104.99) | 0.98(0.76,1.21) |
| Kuwait | 305.07(194.04,481.43) | 617.32(399.60,919.69) | 3.41(3.00,3.82) | 74.94(66.75,84.10) | 87.24(80.42,94.48) | 0.78(0.71,0.84) |
| Kyrgyzstan | 169.75(107.23,252.25) | 266.77(170.86,393.28) | 1.59(1.27,1.91) | 13.69(11.70,16.04) | 16.76(14.81,18.91) | 0.49(0.43,0.54) |
| Lao People's Democratic Republic | 669.71(414.16,1001.75) | 1787.84(1111.01,2809.86) | 3.77(3.43,4.11) | 52.12(48.23,56.31) | 85.66(81.74,89.75) | 1.87(1.79,1.95) |
| Latvia | 55.39(34.24,81.01) | 36.85(24.05,53.01) | -1.47(-1.96,-0.97) | 9.87(7.43,12.86) | 12.94(9.04,17.99) | 0.98(0.90,1.05) |
| Lebanon | 547.42(347.86,845.29) | 744.50(481.92,1124.66) | 1.39(1.14,1.63) | 61.27(56.24,66.68) | 76.20(70.80,81.89) | 0.82(0.79,0.85) |
| Lesotho | 148.76(90.35,220.85) | 242.54(153.71,366.37) | 1.23(0.86,1.60) | 26.01(21.96,30.84) | 37.63(33.03,42.81) | 1.21(1.10,1.33) |
| Liberia | 122.41(75.99,180.94) | 452.23(276.62,671.86) | 4.70(4.44,4.97) | 21.13(17.50,25.49) | 29.42(26.76,32.32) | 1.23(1.15,1.31) |
| Libya | 926.25(581.66,1445.47) | 1293.64(818.00,1986.36) | 1.01(0.77,1.25) | 68.28(63.92,72.99) | 75.14(71.09,79.35) | 0.46(0.40,0.52) |
| Lithuania | 77.40(49.64,113.02) | 55.79(36.27,79.50) | -0.86(-1.24,-0.48) | 9.18(7.24,11.48) | 12.48(9.38,16.30) | 1.17(1.08,1.25) |
| Luxembourg | 60.38(37.78,93.67) | 121.20(75.72,194.68) | 2.64(2.55,2.73) | 92.35(70.47,118.90) | 122.83(101.89,146.81) | 0.86(0.75,0.96) |
| Madagascar | 753.04(476.45,1121.42) | 1996.58(1240.64,2921.37) | 3.43(3.39,3.48) | 20.88(19.40,22.49) | 23.85(22.81,24.94) | 0.45(0.40,0.50) |
| Malawi | 798.26(488.76,1239.77) | 2019.85(1230.31,3079.59) | 3.22(3.05,3.39) | 27.20(25.33,29.22) | 30.51(29.18,31.91) | 0.50(0.39,0.61) |
| Malaysia | 4768.29(2866.65,7645.36) | 10838.33(6851.45,16793.75) | 3.06(2.57,3.55) | 91.58(89.00,94.23) | 136.43(133.87,139.02) | 1.51(1.31,1.70) |
| Maldives | 37.82(23.01,57.92) | 95.35(59.23,150.72) | 3.90(3.19,4.60) | 55.41(39.06,79.80) | 112.82(91.26,137.94) | 3.03(2.81,3.26) |
| Mali | 387.53(238.97,571.36) | 1712.00(1075.51,2560.17) | 5.14(5.00,5.27) | 16.56(14.94,18.34) | 24.68(23.51,25.92) | 1.17(0.98,1.36) |
| Malta | 70.25(44.39,108.28) | 74.04(46.81,113.19) | 0.07(-0.41,0.55) | 87.48(68.21,110.62) | 120.89(94.87,151.85) | 1.02(0.83,1.21) |
| Marshall Islands | 5.90(3.70,8.90) | 10.62(6.69,16.31) | 1.27(0.75,1.79) | 42.95(15.45,128.53) | 66.23(32.57,122.31) | 1.31(1.13,1.49) |
| Mauritania | 154.51(95.54,238.22) | 447.89(275.46,691.62) | 3.32(3.11,3.53) | 25.43(21.55,30.02) | 33.71(30.64,37.08) | 0.67(0.48,0.85) |
| Mauritius | 269.55(163.42,433.44) | 350.52(219.89,551.25) | 0.77(0.49,1.05) | 89.86(79.45,101.42) | 126.74(113.82,140.74) | 1.26(1.12,1.41) |
| Mexico | 27607.14(18734.48,39248.01) | 30443.40(21148.50,42147.74) | -0.25(-0.41,-0.10) | 93.12(92.02,94.23) | 93.63(92.58,94.69) | -0.57(-0.74,-0.39) |
| Federated States of Micronesia | 17.79(11.04,27.72) | 23.22(14.67,35.95) | 0.48(0.12,0.85) | 53.80(31.64,93.88) | 72.92(46.30,111.38) | 0.86(0.65,1.07) |
| Principality of Monaco | 3.93(2.50,6.26) | 6.53(4.07,10.02) | 2.14(2.03,2.24) | 100.36(26.71,260.71) | 122.71(47.34,259.36) | 0.58(0.48,0.68) |
| Mongolia | 87.25(54.26,131.19) | 128.31(82.36,186.12) | 1.38(0.97,1.79) | 13.23(10.57,16.62) | 18.65(15.53,22.22) | 1.14(1.10,1.18) |
| Montenegro | 10.46(6.63,15.59) | 10.67(6.57,15.43) | 0.02(-0.02,0.07) | 6.77(3.31,12.38) | 8.81(4.33,15.97) | 1.00(0.92,1.08) |
| Morocco | 4273.02(2670.60,6651.42) | 6269.56(3977.38,9606.51) | 1.22(1.02,1.43) | 53.67(52.07,55.32) | 68.68(66.99,70.40) | 0.86(0.83,0.89) |
| Mozambique | 809.13(500.70,1178.78) | 2862.17(1748.44,4309.61) | 4.21(4.08,4.33) | 20.42(19.02,21.91) | 29.44(28.36,30.57) | 1.23(1.15,1.32) |
| Myanmar | 6087.79(3756.41,9160.69) | 13071.36(8128.69,20454.63) | 3.05(2.87,3.22) | 48.53(47.32,49.78) | 88.32(86.82,89.85) | 2.47(2.34,2.61) |
| Namibia | 129.08(80.13,192.32) | 263.60(166.67,406.26) | 2.40(2.06,2.74) | 27.69(23.07,33.30) | 36.72(32.42,41.51) | 0.87(0.74,1.00) |
| Republic of Nauru | 1.76(1.11,2.79) | 2.68(1.68,4.08) | 1.10(0.94,1.26) | 60.70(5.91,295.66) | 82.32(14.90,293.20) | 0.87(0.78,0.95) |
| Nepal | 951.29(589.18,1391.12) | 2721.47(1756.77,3992.89) | 3.85(3.76,3.95) | 17.09(16.01,18.23) | 27.57(26.54,28.63) | 1.71(1.65,1.77) |
| Netherlands | 2699.90(1707.54,4209.84) | 3232.32(2019.91,5021.92) | 0.94(0.81,1.07) | 82.67(79.58,85.86) | 106.67(103.02,110.41) | 0.78(0.68,0.87) |
| New Zealand | 2158.26(1219.44,3670.88) | 2183.58(1322.67,3436.92) | -0.01(-0.15,0.13) | 244.38(234.18,254.92) | 255.20(244.61,266.14) | -0.40(-0.57,-0.22) |
| Nicaragua | 554.00(365.32,794.96) | 1112.18(745.15,1572.75) | 2.23(1.88,2.59) | 43.70(40.12,47.66) | 60.58(57.07,64.26) | 1.03(0.94,1.13) |
| Niger | 393.81(243.11,573.41) | 1585.40(976.41,2321.64) | 4.66(4.55,4.76) | 17.24(15.55,19.11) | 22.08(20.98,23.24) | 0.82(0.68,0.95) |
| Nigeria | 6897.07(4381.54,10131.42) | 23043.69(14548.42,34445.93) | 3.84(3.66,4.02) | 25.13(24.53,25.75) | 32.52(32.09,32.95) | 0.66(0.48,0.84) |
| Republic of Niue | 0.37(0.23,0.60) | 0.34(0.22,0.54) | -1.01(-1.32,-0.70) | 65.64(0.01,942.61) | 92.38(0.00,1291.08) | 1.13(0.95,1.30) |
| North Macedonia | 29.86(17.30,45.59) | 31.51(19.96,45.47) | 0.33(0.08,0.58) | 5.93(3.99,8.48) | 8.15(5.52,11.61) | 1.14(1.08,1.20) |
| Northern Mariana Islands | 9.62(6.10,15.33) | 10.84(6.93,16.89) | 0.63(-0.08,1.33) | 72.78(34.24,146.34) | 89.65(44.27,186.55) | 0.57(0.40,0.74) |
| Norway | 1074.31(669.21,1748.30) | 1201.42(756.42,1932.32) | 0.57(0.36,0.79) | 116.43(109.57,123.61) | 128.54(121.36,136.03) | 0.00(-0.12,0.12) |
| Oman | 219.22(135.81,341.05) | 607.14(387.11,906.59) | 2.88(2.23,3.54) | 51.11(44.55,58.66) | 79.28(73.08,85.89) | 1.65(1.56,1.73) |
| Pakistan | 9660.99(6046.68,14152.02) | 23659.06(14974.36,35269.59) | 3.33(3.23,3.42) | 30.55(29.93,31.17) | 34.45(34.01,34.90) | 0.62(0.51,0.73) |
| Republic of Palau | 3.16(2.00,4.93) | 3.06(1.95,4.67) | -0.16(-0.58,0.27) | 68.56(14.94,220.71) | 92.26(19.39,278.84) | 0.91(0.74,1.08) |
| Palestine | 341.09(212.73,536.57) | 978.64(617.73,1543.91) | 4.07(3.81,4.34) | 53.49(47.92,59.78) | 65.15(61.12,69.41) | 0.69(0.63,0.75) |
| Panama | 301.18(197.29,437.57) | 634.90(413.93,890.94) | 2.49(2.36,2.62) | 40.83(36.34,45.83) | 62.13(57.39,67.16) | 1.28(1.20,1.36) |
| Papua New Guinea | 494.90(314.60,727.77) | 1529.54(952.83,2314.23) | 3.94(3.72,4.17) | 40.91(37.38,44.78) | 57.08(54.25,60.03) | 0.91(0.73,1.09) |
| Paraguay | 177.82(111.93,272.27) | 437.93(279.21,651.34) | 3.35(3.10,3.60) | 15.50(13.30,18.05) | 23.14(21.02,25.42) | 1.52(1.47,1.56) |
| Peru | 4689.32(3058.58,6818.41) | 7225.06(4894.32,9977.84) | 1.44(1.33,1.55) | 67.51(65.59,69.49) | 88.99(86.95,91.06) | 0.92(0.86,0.98) |
| Philippines | 13593.36(8420.67,20482.79) | 32415.06(20494.65,50371.91) | 3.27(3.09,3.46) | 68.08(66.94,69.25) | 104.04(102.91,105.18) | 1.62(1.52,1.71) |
| Poland | 950.76(601.91,1403.66) | 539.41(378.54,766.42) | -2.43(-3.05,-1.81) | 11.14(10.44,11.87) | 9.25(8.47,10.08) | -0.86(-1.12,-0.59) |
| Portugal | 2033.81(1287.72,3157.68) | 1860.77(1161.71,2902.51) | -0.90(-1.09,-0.71) | 80.02(76.58,83.57) | 109.92(104.97,115.03) | 0.85(0.62,1.08) |
| Puerto Rico | 529.98(343.64,799.74) | 457.43(301.19,670.98) | -0.48(-0.68,-0.27) | 53.81(49.32,58.59) | 66.81(60.82,73.23) | 0.74(0.66,0.81) |
| Qatar | 55.68(34.99,84.57) | 224.95(145.30,331.97) | 5.04(4.87,5.22) | 74.28(56.04,97.91) | 85.70(74.77,97.78) | 0.55(0.49,0.60) |
| Republic of Korea | 15691.30(9255.77,23797.55) | 15040.89(8784.52,23416.89) | -0.21(-0.74,0.33) | 117.77(115.93,119.63) | 195.61(192.49,198.76) | 1.20(0.75,1.66) |
| Republic of Moldova | 86.10(53.84,125.14) | 75.64(48.69,108.44) | -0.53(-0.79,-0.27) | 8.23(6.57,10.18) | 11.69(9.15,14.73) | 1.28(1.15,1.42) |
| Romania | 344.32(212.21,509.67) | 266.75(161.05,396.61) | -1.30(-1.58,-1.02) | 6.12(5.49,6.81) | 8.50(7.50,9.60) | 1.17(1.14,1.20) |
| Russian Federation | 3764.13(2422.35,5273.99) | 3637.99(2389.51,5029.19) | -0.45(-0.88,-0.02) | 11.32(10.96,11.69) | 14.71(14.22,15.21) | 0.87(0.85,0.89) |
| Rwanda | 530.07(327.63,782.13) | 1240.75(765.90,1838.71) | 3.48(3.00,3.96) | 24.61(22.54,26.89) | 30.20(28.54,31.96) | 0.81(0.75,0.88) |
| Saint Kitts and Nevis | 5.33(3.41,8.11) | 7.44(4.74,11.22) | 1.27(1.06,1.49) | 42.65(14.41,126.58) | 55.46(23.03,112.12) | 0.83(0.75,0.91) |
| Saint Lucia | 16.42(10.20,25.61) | 18.84(12.09,28.18) | 0.39(0.06,0.72) | 36.56(21.00,63.54) | 47.15(28.30,73.85) | 0.64(0.49,0.80) |
| Saint Vincent and the Grenadines | 12.06(7.63,18.14) | 12.86(8.14,19.65) | 0.16(0.06,0.26) | 33.63(17.30,66.49) | 48.43(25.68,83.11) | 1.27(1.18,1.35) |
| Samoa | 34.01(20.97,54.13) | 53.68(34.02,81.86) | 1.40(1.30,1.49) | 62.41(43.09,91.08) | 80.00(59.99,105.89) | 0.71(0.56,0.86) |
| Republic of San Marino | 5.54(3.49,8.64) | 7.28(4.61,11.35) | 1.04(0.98,1.10) | 96.18(33.50,219.61) | 118.56(48.68,241.25) | 0.63(0.51,0.75) |
| Sao Tome and Principe | 8.08(5.06,12.14) | 20.35(12.80,30.93) | 2.72(2.40,3.04) | 22.17(9.44,51.48) | 30.73(18.81,49.00) | 0.92(0.71,1.13) |
| Saudi Arabia | 2856.42(1783.38,4449.48) | 5979.72(3857.24,9053.02) | 2.94(2.65,3.24) | 62.98(60.69,65.38) | 84.43(82.29,86.60) | 1.11(1.08,1.14) |
| Senegal | 544.55(335.21,814.18) | 1328.30(824.50,1995.43) | 2.72(2.47,2.98) | 23.36(21.41,25.49) | 28.59(27.06,30.19) | 0.45(0.31,0.58) |
| Serbia | 128.08(78.73,189.12) | 129.60(79.86,188.10) | -0.22(-0.37,-0.07) | 6.12(5.10,7.28) | 8.17(6.81,9.71) | 1.14(1.07,1.21) |
| Seychelles | 21.27(12.78,34.49) | 24.51(15.37,38.99) | 0.39(0.23,0.56) | 95.43(59.23,152.80) | 120.58(77.64,178.74) | 0.72(0.60,0.83) |
| Sierra Leone | 194.12(123.12,281.90) | 806.29(498.86,1216.67) | 5.28(5.14,5.42) | 18.63(16.09,21.56) | 29.42(27.41,31.58) | 1.38(1.25,1.51) |
| Singapore | 1020.02(596.68,1610.60) | 1662.35(983.19,2610.21) | 2.40(1.57,3.24) | 134.79(126.63,143.33) | 236.04(224.79,247.71) | 1.88(1.66,2.10) |
| Slovakia | 78.89(48.31,118.91) | 73.12(44.77,106.66) | -0.56(-0.87,-0.25) | 6.25(4.94,7.80) | 8.52(6.65,10.78) | 1.04(1.01,1.07) |
| Slovenia | 28.80(17.61,43.12) | 26.17(16.23,39.06) | -0.61(-0.86,-0.37) | 6.60(4.41,9.51) | 9.03(5.87,13.33) | 1.13(1.04,1.21) |
| Solomon Islands | 46.35(29.07,68.76) | 118.86(74.68,181.92) | 2.91(2.60,3.21) | 42.38(30.95,58.57) | 61.91(51.27,74.39) | 1.12(0.87,1.37) |
| Somalia | 416.91(252.62,618.85) | 1486.37(918.63,2177.97) | 4.22(4.09,4.35) | 20.70(18.73,22.87) | 23.97(22.75,25.26) | 0.60(0.54,0.65) |
| South Africa | 4785.05(3008.14,7186.77) | 6961.36(4400.08,10328.37) | 1.30(0.93,1.68) | 39.69(38.57,40.84) | 50.98(49.79,52.20) | 0.87(0.82,0.92) |
| South Sudan | 403.82(252.39,606.34) | 753.29(464.09,1135.08) | 2.00(1.80,2.21) | 22.76(20.56,25.23) | 25.02(23.23,26.93) | 0.16(0.04,0.27) |
| Spain | 8648.59(5464.71,13787.15) | 7607.31(4824.05,12046.20) | -1.04(-1.21,-0.88) | 89.60(87.72,91.51) | 114.81(112.24,117.42) | 0.65(0.48,0.81) |
| Sri Lanka | 3749.18(2295.27,5859.77) | 5772.81(3613.22,9233.28) | 1.36(0.97,1.74) | 74.62(72.25,77.05) | 111.69(108.83,114.61) | 1.59(1.27,1.90) |
| Sudan | 2316.71(1470.00,3515.56) | 7898.96(4985.67,12163.22) | 4.10(3.98,4.22) | 37.29(35.78,38.87) | 62.06(60.69,63.45) | 1.72(1.58,1.87) |
| Suriname | 43.18(27.59,67.64) | 68.73(43.90,103.24) | 1.85(1.65,2.05) | 38.09(27.57,51.92) | 50.26(39.08,63.64) | 0.91(0.88,0.94) |
| Sweden | 1294.74(815.02,1973.15) | 1560.38(978.63,2447.70) | 0.62(0.38,0.87) | 78.06(73.86,82.44) | 95.31(90.63,100.17) | 0.37(0.18,0.56) |
| Switzerland | 1122.91(712.90,1708.37) | 1340.97(840.42,2105.17) | 0.90(0.74,1.07) | 90.74(85.50,96.22) | 106.98(101.31,112.88) | 0.50(0.46,0.54) |
| Syrian Arab Republic | 2220.07(1367.15,3414.14) | 3709.57(2345.19,5785.89) | 1.71(1.16,2.26) | 53.98(51.74,56.33) | 69.23(67.00,71.53) | 0.93(0.85,1.00) |
| Taiwan (Province of China) | 2877.70(1816.30,4539.16) | 2992.98(1973.51,4367.37) | 0.22(-0.03,0.46) | 54.42(52.45,56.46) | 82.33(79.40,85.35) | 1.58(1.53,1.62) |
| Tajikistan | 180.19(111.35,263.09) | 381.23(243.18,554.26) | 2.86(2.61,3.12) | 11.49(9.85,13.47) | 15.02(13.55,16.63) | 0.82(0.77,0.87) |
| Thailand | 12386.14(7577.80,19598.72) | 15258.45(9561.78,24409.56) | 0.89(0.56,1.23) | 70.61(69.37,71.87) | 119.85(117.96,121.77) | 1.81(1.48,2.14) |
| Timor-Leste | 102.59(63.66,155.61) | 343.41(209.45,525.83) | 4.74(4.58,4.89) | 49.65(40.49,60.64) | 74.71(66.98,83.34) | 1.68(1.61,1.76) |
| Togo | 214.91(134.40,317.31) | 639.34(396.90,960.34) | 3.42(3.12,3.72) | 19.48(16.93,22.42) | 27.93(25.81,30.21) | 0.98(0.82,1.14) |
| Tokelau | 0.23(0.14,0.37) | 0.28(0.17,0.44) | 0.02(-0.66,0.71) | 56.79(0.00,1563.26) | 85.04(0.00,1896.30) | 1.28(1.13,1.43) |
| Tonga | 22.46(13.85,35.67) | 27.61(17.53,42.32) | 0.37(0.12,0.62) | 69.62(43.73,109.80) | 91.26(60.42,133.93) | 0.62(0.39,0.86) |
| Trinidad and Tobago | 125.93(81.15,193.10) | 141.83(93.61,212.49) | 0.01(-0.56,0.57) | 38.04(31.68,45.45) | 53.02(44.63,62.53) | 1.20(1.09,1.31) |
| Tunisia | 1337.83(830.77,2077.54) | 1671.39(1072.42,2554.75) | 0.64(0.21,1.07) | 52.18(49.41,55.10) | 70.45(67.11,73.92) | 1.14(1.11,1.18) |
| Turkey | 9363.37(5826.84,14786.25) | 13179.81(8299.36,20153.79) | 1.12(1.02,1.21) | 50.76(49.73,51.80) | 69.00(67.83,70.19) | 1.17(1.13,1.22) |
| Turkmenistan | 152.76(95.47,235.14) | 228.49(145.23,339.91) | 1.42(1.13,1.71) | 14.10(11.93,16.70) | 19.84(17.35,22.59) | 1.13(1.10,1.15) |
| Tuvalu | 1.26(0.78,1.94) | 2.51(1.58,3.85) | 2.38(2.33,2.44) | 52.76(2.53,263.08) | 78.26(13.08,273.69) | 1.11(0.93,1.29) |
| Uganda | 1265.32(782.94,1899.32) | 3907.72(2354.64,5966.48) | 4.02(3.90,4.14) | 23.15(21.87,24.52) | 28.42(27.53,29.35) | 0.70(0.67,0.73) |
| Ukraine | 1225.40(801.43,1697.84) | 964.83(621.03,1332.70) | -0.90(-1.23,-0.58) | 10.73(10.14,11.35) | 13.23(12.38,14.13) | 0.72(0.65,0.79) |
| United Arab Emirates | 204.70(128.11,318.37) | 811.15(517.85,1255.90) | 4.45(3.86,5.05) | 63.19(54.81,72.93) | 80.45(74.97,86.25) | 0.83(0.72,0.94) |
| United Kingdom of Great Britain and Northern Ireland | 12263.34(7740.45,19529.03) | 14508.92(9094.99,23082.59) | 0.88(0.62,1.14) | 105.42(103.56,107.31) | 133.35(131.19,135.54) | 0.58(0.42,0.75) |
| United Republic of Tanzania | 2210.65(1348.33,3373.03) | 5735.22(3543.21,8934.12) | 3.17(3.02,3.32) | 26.35(25.25,27.50) | 31.62(30.80,32.46) | 0.56(0.47,0.66) |
| United States of America | 82541.33(47749.25,128365.16) | 112443.80(74525.47,156014.43) | -0.48(-1.04,0.08) | 155.72(154.66,156.79) | 177.93(176.89,178.97) | -1.27(-1.90,-0.63) |
| United States Virgin Islands | 15.09(9.71,23.35) | 12.25(8.01,17.95) | -0.77(-1.01,-0.52) | 52.21(29.27,86.93) | 64.39(33.51,112.14) | 0.69(0.59,0.78) |
| Uruguay | 416.47(245.75,639.20) | 696.65(424.69,1070.91) | 1.79(1.51,2.07) | 54.96(49.80,60.50) | 94.71(87.80,102.01) | 1.85(1.62,2.09) |
| Uzbekistan | 868.15(537.85,1319.92) | 1677.34(1074.17,2501.14) | 2.39(2.17,2.63) | 14.20(13.26,15.22) | 19.74(18.81,20.71) | 1.03(0.92,1.14) |
| Vanuatu | 21.59(13.64,32.75) | 55.68(35.48,84.68) | 3.35(3.19,3.51) | 48.64(30.28,77.87) | 66.28(50.01,87.04) | 1.03(0.96,1.09) |
| Bolivarian Republic of Venezuela | 3134.36(2038.59,4554.33) | 4554.08(3029.42,6687.96) | 1.39(1.07,1.72) | 53.74(51.87,55.67) | 68.02(66.05,70.02) | 0.69(0.63,0.76) |
| Socialist Republic of Viet Nam | 9818.99(6034.82,14674.46) | 16396.88(10165.85,24962.05) | 2.40(1.88,2.92) | 46.23(45.31,47.16) | 82.37(81.11,83.65) | 2.50(2.34,2.66) |
| Yemen | 1401.25(889.78,2103.94) | 4472.00(2818.76,6773.75) | 4.05(3.91,4.20) | 38.21(36.22,40.31) | 46.31(44.96,47.70) | 0.97(0.84,1.11) |
| Zambia | 815.91(489.93,1234.01) | 2174.85(1329.63,3376.34) | 3.40(3.27,3.52) | 29.56(27.53,31.76) | 35.70(34.20,37.26) | 0.50(0.45,0.55) |
| Zimbabwe | 1084.42(669.70,1660.48) | 1648.04(1026.37,2477.13) | 0.71(0.34,1.07) | 31.11(29.26,33.10) | 33.75(32.13,35.44) | -0.08(-0.27,0.12) |

**Table S4. The Top and Bottom three countries in 2019 and trends from 1990 to 2019.**

| Measure | Top three countries |  |  | Bottom three countries |  |  |
| --- | --- | --- | --- | --- | --- | --- |
| 2019 ASR (per 100,000 people) |  |  |  |  |  |  |
| Age-standardized DALY rate | New Zealand(90.15) | Japan(106.46) | Italy(131.63) | Bosnia and Herzegovina(3.09) | Albania(3.14) | North Macedonia(3.15) |
| ASIR | Brunei Darussalam(242.43) | New Zealand(255.20) | Japan(413.50) | Bosnia and Herzegovina(7.99) | Albania(7.99) | North Macedonia(8.15) |
| 1990-2019 increase times |  |  |  |  |  |  |
| DALY (cases) | United Arab Emirates(6.45) | Qatar(6.85) | Equatorial Guinea(8.94) | Italy(0.84) | Japan(0.85) | Latvia(0.87) |
| Incidence (case) | Benin(4.94) | Angola(5.05) | Equatorial Guinea(7.43) | Poland(0.57) | Italy(0.60) | Latvia(0.67) |
| EAPC |  |  |  |  |  |  |
| DALY | Myanmar(3.21) | Equatorial Guinea(3.56) | Maldives(4.00) | United States of America(-0.88) | Mexico(-0.62) | Italy(-0.34) |
| Incidence | Socialist Republic of Viet Nam(2.50) | Equatorial Guinea(2.72) | Maldives(3.03) | United States of America(-1.27) | Poland(-0.86) | Italy(-0.72) |

Table S5. DALYs of PCOS in women of reproductive age in 1990 and 2019 for female and all nations.

| DALYs (Disability-Adjusted Life Years) | DALY No.(95%UI) | | | Age-standardized DALY rate (per 100000) No.95%UI | | |
| --- | --- | --- | --- | --- | --- | --- |
| nation | 1990 | 2019 | 1990-2019 EAPC No.(95%CI) | 1990 | 2019 | 1990-2019 EAPC No.(95%CI) |
| Afghanistan | 346.15(144.88,703.52) | 1835.70(744.43,3697.50) | 6.05(5.55,6.56) | 13.75(12.26,15.39) | 20.64(19.66,21.67) | 2.01(1.63,2.39) |
| Albania | 19.18(7.41,41.14) | 19.98(8.21,41.92) | -0.08(-0.33,0.16) | 2.30(1.37,3.71) | 3.14(1.91,4.89) | 1.01(0.90,1.13) |
| Algeria | 1494.88(613.53,3104.26) | 4237.79(1759.11,8637.38) | 3.92(3.72,4.12) | 25.32(23.99,26.71) | 37.93(36.79,39.10) | 1.61(1.53,1.69) |
| American Samoa | 4.00(1.65,8.00) | 6.34(2.64,13.08) | 1.16(0.74,1.58) | 32.83(8.50,96.34) | 46.50(17.35,103.99) | 1.07(0.82,1.32) |
| Andorra | 7.20(3.04,14.58) | 11.90(4.98,23.49) | 1.38(0.94,1.81) | 47.64(19.20,102.02) | 60.50(29.60,114.14) | 0.77(0.64,0.91) |
| Angola | 128.02(52.05,262.67) | 747.74(306.81,1515.18) | 6.13(5.92,6.34) | 5.60(4.64,6.72) | 10.58(9.81,11.39) | 2.03(1.84,2.22) |
| Antigua and Barbuda | 2.94(1.22,6.04) | 6.05(2.50,12.36) | 2.26(1.88,2.64) | 17.94(3.54,59.28) | 24.88(9.08,55.91) | 0.90(0.81,0.99) |
| Argentina | 1450.49(613.06,2957.95) | 3446.60(1453.77,7193.91) | 3.02(2.81,3.22) | 18.12(17.20,19.08) | 29.34(28.37,30.34) | 1.64(1.44,1.85) |
| Armenia | 41.45(16.54,84.57) | 58.79(24.17,119.12) | 1.22(1.05,1.39) | 4.72(3.36,6.53) | 7.78(5.87,10.22) | 1.76(1.72,1.81) |
| Australia | 2733.44(1166.62,5347.51) | 4367.91(1895.92,8858.28) | 1.37(1.25,1.49) | 61.05(58.78,63.40) | 75.18(72.94,77.49) | 0.51(0.36,0.66) |
| Austria | 1215.27(519.99,2473.53) | 1299.65(550.22,2602.75) | 0.03(-0.08,0.15) | 61.04(57.63,64.61) | 65.62(62.01,69.41) | 0.00(-0.11,0.12) |
| Azerbaijan | 92.49(36.68,190.92) | 228.99(93.36,469.84) | 3.48(3.28,3.68) | 4.87(3.88,6.07) | 8.25(7.20,9.43) | 2.02(1.87,2.17) |
| Commonwealth of the Bahamas | 17.26(7.16,35.87) | 29.83(12.23,61.55) | 1.85(1.64,2.06) | 23.53(13.64,38.66) | 28.58(19.22,41.07) | 0.60(0.50,0.70) |
| Bahrain | 43.06(17.80,89.38) | 137.92(56.88,286.92) | 4.74(4.43,5.06) | 36.38(25.86,50.98) | 42.31(35.34,50.36) | 0.49(0.46,0.52) |
| Bangladesh | 1374.46(562.11,2815.30) | 4286.81(1771.07,8726.86) | 4.24(4.06,4.43) | 5.53(5.23,5.85) | 9.53(9.25,9.82) | 2.16(1.98,2.33) |
| Barbados | 15.95(6.57,32.58) | 19.70(8.45,39.62) | 0.66(0.60,0.72) | 23.10(13.14,38.26) | 27.85(16.81,43.82) | 0.55(0.49,0.60) |
| Belarus | 75.78(29.65,159.33) | 93.91(38.61,191.09) | 0.74(0.63,0.85) | 2.96(2.33,3.72) | 4.29(3.43,5.34) | 1.34(1.24,1.43) |
| Belgium | 1232.68(516.27,2527.50) | 1521.14(633.93,3027.32) | 0.61(0.39,0.84) | 50.26(47.48,53.17) | 61.35(58.25,64.58) | 0.57(0.33,0.81) |
| Belize | 7.70(3.19,15.45) | 31.16(12.76,63.50) | 4.75(4.36,5.14) | 18.04(7.20,41.10) | 27.16(18.43,38.81) | 1.17(0.85,1.50) |
| Benin | 70.02(29.75,142.55) | 376.17(153.61,780.21) | 5.79(5.46,6.12) | 6.40(4.94,8.23) | 12.42(11.16,13.80) | 2.16(1.86,2.46) |
| Bermuda | 5.00(2.07,10.22) | 4.44(1.87,8.94) | -0.52(-0.73,-0.31) | 29.15(9.23,74.28) | 32.43(8.99,88.84) | 0.26(0.19,0.33) |
| Bhutan | 11.46(4.61,23.92) | 32.74(13.50,68.51) | 4.41(4.20,4.62) | 8.20(4.02,15.64) | 15.83(10.86,22.50) | 2.54(2.41,2.68) |
| Plurinational State of Bolivia | 511.87(221.61,1027.24) | 1441.60(614.18,2867.66) | 3.65(3.58,3.73) | 33.56(30.66,36.68) | 47.09(44.69,49.60) | 1.15(1.06,1.24) |
| Bosnia and Herzegovina | 22.09(8.58,44.51) | 23.17(9.13,46.97) | 0.59(0.11,1.07) | 1.87(1.17,2.84) | 3.09(1.94,4.73) | 1.90(1.65,2.15) |
| Botswana | 32.61(13.22,67.81) | 110.79(46.43,225.22) | 4.65(4.38,4.93) | 10.13(6.83,14.77) | 16.54(13.59,19.99) | 2.12(1.95,2.29) |
| Brazil | 3434.82(1451.32,6987.67) | 5737.73(2415.64,11772.54) | 1.28(1.08,1.48) | 8.78(8.49,9.08) | 9.79(9.54,10.05) | -0.13(-0.29,0.03) |
| Brunei Darussalam | 26.91(11.13,55.61) | 81.26(34.89,169.42) | 3.90(3.49,4.31) | 39.34(25.52,59.72) | 64.86(51.47,80.89) | 1.81(1.61,2.01) |
| Bulgaria | 56.14(23.02,116.33) | 51.43(20.20,104.86) | -0.30(-0.41,-0.18) | 2.72(2.05,3.54) | 3.52(2.58,4.74) | 0.90(0.84,0.96) |
| Burkina Faso | 128.85(52.62,265.17) | 547.54(220.86,1168.28) | 4.94(4.74,5.14) | 6.12(5.08,7.32) | 10.11(9.26,11.03) | 1.48(1.25,1.72) |
| Burundi | 77.18(31.15,159.61) | 185.32(75.44,381.61) | 3.26(3.11,3.41) | 6.16(4.82,7.82) | 6.69(5.73,7.80) | 0.17(0.11,0.24) |
| Republic of Cabo Verde | 5.65(2.30,11.74) | 18.43(7.71,38.10) | 4.02(3.58,4.46) | 7.18(2.33,18.72) | 12.40(7.37,19.82) | 1.68(1.42,1.94) |
| Cambodia | 416.38(175.52,843.77) | 1337.57(563.58,2728.92) | 4.29(4.18,4.40) | 16.73(15.13,18.48) | 30.18(28.58,31.86) | 2.14(2.10,2.17) |
| Cameroon | 241.38(97.39,500.16) | 1023.84(426.32,2172.93) | 4.84(4.67,5.01) | 10.13(8.85,11.57) | 13.94(13.07,14.86) | 0.81(0.68,0.94) |
| Canada | 1751.29(732.28,3654.12) | 2490.72(1047.47,5205.61) | 1.13(0.97,1.28) | 23.48(22.38,24.63) | 30.75(29.54,32.01) | 0.90(0.76,1.03) |
| Central African Republic | 49.32(20.33,102.50) | 109.12(44.03,221.70) | 2.47(2.26,2.69) | 7.66(5.62,10.29) | 8.29(6.77,10.09) | 0.01(-0.15,0.16) |
| Chad | 60.17(24.59,124.19) | 255.03(105.16,530.60) | 4.53(4.24,4.83) | 4.60(3.48,6.01) | 7.24(6.34,8.25) | 1.08(0.77,1.38) |
| Chile | 701.66(298.46,1457.19) | 1637.92(689.10,3415.48) | 3.05(2.61,3.50) | 19.30(17.89,20.80) | 35.45(33.75,37.23) | 2.17(1.80,2.53) |
| China | 39363.84(16491.51,79998.98) | 85343.89(36400.75,171980.34) | 2.88(2.46,3.30) | 12.23(12.11,12.36) | 24.16(23.99,24.33) | 2.40(2.15,2.65) |
| Colombia | 2214.92(954.32,4472.42) | 4387.76(1845.63,8828.09) | 2.17(2.01,2.33) | 25.22(24.16,26.32) | 34.74(33.72,35.78) | 0.99(0.93,1.04) |
| Comoros | 10.28(4.21,20.94) | 21.85(9.04,45.20) | 2.39(2.16,2.63) | 9.80(4.60,19.04) | 11.81(7.37,18.07) | 0.46(0.26,0.65) |
| Congo | 45.27(18.57,92.01) | 155.06(65.39,320.03) | 4.14(3.85,4.42) | 8.09(5.82,11.09) | 11.41(9.67,13.38) | 1.00(0.80,1.20) |
| Cook Islands | 1.57(0.66,3.28) | 2.24(0.91,4.62) | 1.11(0.80,1.42) | 34.08(2.50,166.93) | 52.05(7.38,182.86) | 1.32(1.13,1.52) |
| Costa Rica | 249.97(103.19,514.18) | 567.78(233.77,1162.84) | 2.70(2.42,2.99) | 31.75(27.86,36.12) | 43.88(40.33,47.67) | 0.97(0.88,1.06) |
| Croatia | 29.40(11.48,62.41) | 31.17(12.55,65.14) | 0.27(0.14,0.40) | 2.44(1.64,3.53) | 3.41(2.30,4.95) | 1.29(1.16,1.42) |
| Cuba | 608.87(257.70,1261.90) | 690.44(290.24,1405.89) | 0.48(0.31,0.65) | 19.81(18.26,21.47) | 26.96(24.94,29.11) | 1.06(1.01,1.11) |
| Cyprus | 72.63(29.93,146.06) | 194.82(81.42,393.48) | 3.77(3.50,4.04) | 36.65(28.70,46.21) | 55.40(47.57,64.42) | 1.53(1.33,1.72) |
| Czech Republic | 64.62(25.72,138.32) | 78.27(30.12,161.62) | 0.55(0.43,0.68) | 2.52(1.93,3.23) | 3.37(2.62,4.29) | 0.90(0.84,0.97) |
| Republic of C么te d'Ivoire | 177.77(72.13,367.32) | 715.78(294.55,1468.93) | 4.60(4.07,5.13) | 6.50(5.54,7.62) | 11.23(10.40,12.11) | 1.71(1.36,2.06) |
| Democratic People's Republic of Korea | 724.10(300.51,1491.48) | 941.44(393.50,1886.47) | 0.92(0.88,0.97) | 12.95(12.02,13.95) | 14.22(13.32,15.17) | 0.27(0.16,0.39) |
| Democratic Republic of the Congo | 511.44(208.82,1073.30) | 1873.29(783.70,3842.69) | 4.49(4.28,4.70) | 6.04(5.51,6.61) | 9.10(8.68,9.54) | 1.32(1.10,1.54) |
| Denmark | 544.76(226.52,1088.58) | 693.42(284.25,1365.13) | 0.77(0.65,0.89) | 41.62(38.17,45.32) | 55.09(51.02,59.42) | 0.96(0.78,1.13) |
| Djibouti | 7.66(3.17,15.70) | 40.25(16.61,82.41) | 6.49(6.20,6.79) | 7.33(2.95,16.34) | 13.02(9.29,17.85) | 2.14(1.99,2.30) |
| Dominica | 3.07(1.29,6.43) | 4.19(1.78,8.44) | 1.01(0.85,1.17) | 17.94(3.61,57.29) | 25.39(7.18,64.79) | 1.03(0.87,1.18) |
| Dominican Republic | 295.28(122.53,596.71) | 725.88(301.45,1473.47) | 3.18(3.04,3.31) | 15.48(13.71,17.46) | 25.35(23.53,27.27) | 1.79(1.69,1.90) |
| Ecuador | 1132.05(478.50,2309.37) | 2787.11(1188.83,5577.18) | 3.24(2.97,3.51) | 44.68(42.06,47.45) | 60.22(58.00,62.50) | 1.15(0.93,1.38) |
| Egypt | 4246.63(1817.37,8634.46) | 10245.76(4198.49,20848.85) | 2.99(2.84,3.14) | 32.11(31.14,33.11) | 40.68(39.89,41.48) | 0.66(0.59,0.73) |
| El Salvador | 330.55(141.22,660.69) | 656.43(274.70,1350.34) | 2.31(2.13,2.50) | 25.21(22.49,28.20) | 37.14(34.34,40.10) | 1.31(1.16,1.46) |
| Equatorial Guinea | 6.34(2.64,13.20) | 56.74(23.54,118.22) | 8.18(7.62,8.75) | 6.50(2.40,14.97) | 16.77(12.57,22.14) | 3.56(3.06,4.05) |
| Eritrea | 36.27(15.21,75.66) | 142.28(57.77,291.59) | 4.79(4.45,5.14) | 5.35(3.70,7.56) | 8.44(7.08,10.02) | 1.47(1.23,1.72) |
| Estonia | 12.23(4.90,25.30) | 13.88(5.72,28.92) | 0.70(0.57,0.84) | 3.19(1.65,5.66) | 4.90(2.60,8.72) | 1.71(1.62,1.79) |
| Kingdom of Eswatini | 27.09(11.43,56.43) | 55.52(23.52,115.26) | 1.99(1.51,2.47) | 13.87(8.96,20.97) | 17.63(13.21,23.28) | 0.48(0.18,0.78) |
| Ethiopia | 606.23(249.48,1236.34) | 2233.19(918.86,4594.77) | 4.65(4.55,4.76) | 5.40(4.96,5.86) | 8.57(8.21,8.95) | 1.74(1.65,1.84) |
| Fiji | 49.53(20.48,98.85) | 91.67(38.04,187.89) | 2.01(1.72,2.31) | 25.16(18.58,33.54) | 40.27(32.45,49.44) | 1.45(1.25,1.64) |
| Finland | 536.91(228.03,1074.59) | 629.40(261.92,1275.34) | 0.46(0.41,0.51) | 42.14(38.59,45.98) | 55.32(51.03,59.90) | 0.88(0.79,0.97) |
| France | 6022.00(2475.97,11859.42) | 7590.26(3157.36,15089.73) | 0.69(0.60,0.79) | 41.49(40.44,42.56) | 53.67(52.45,54.91) | 0.83(0.76,0.89) |
| Gabon | 20.30(8.30,41.22) | 70.68(29.09,144.70) | 4.17(3.93,4.42) | 9.31(5.55,15.21) | 14.55(11.33,18.46) | 1.35(1.17,1.52) |
| Republic of the Gambia | 14.97(6.11,30.74) | 59.05(24.23,121.85) | 4.39(4.12,4.67) | 6.61(3.55,11.93) | 10.21(7.69,13.46) | 1.21(1.00,1.42) |
| Georgia | 85.30(34.74,176.14) | 96.74(40.51,196.24) | 0.56(0.39,0.74) | 6.17(4.93,7.65) | 11.90(9.59,14.66) | 2.53(2.26,2.80) |
| Germany | 7816.44(3202.89,15726.56) | 8665.76(3665.90,17634.98) | 0.17(0.02,0.32) | 39.77(38.88,40.67) | 49.99(48.92,51.08) | 0.69(0.62,0.77) |
| Ghana | 238.71(96.01,495.99) | 916.87(369.89,1861.27) | 4.42(4.14,4.69) | 6.77(5.91,7.74) | 10.54(9.86,11.26) | 1.16(0.86,1.45) |
| Greece | 1204.80(505.48,2455.16) | 1361.46(567.14,2722.17) | 0.18(-0.29,0.65) | 47.85(45.18,50.63) | 61.44(58.07,64.97) | 0.66(0.42,0.90) |
| Greenland | 2.94(1.24,6.03) | 3.45(1.44,7.09) | 0.74(0.60,0.88) | 19.23(3.63,65.16) | 26.71(6.28,76.73) | 1.18(1.07,1.29) |
| Grenada | 2.93(1.23,6.10) | 5.84(2.47,11.90) | 2.14(1.60,2.69) | 14.96(2.81,52.11) | 22.39(8.02,50.81) | 1.15(0.97,1.33) |
| Guam | 12.89(5.37,26.28) | 20.71(8.77,42.63) | 1.46(1.19,1.73) | 36.55(19.20,65.82) | 53.68(33.04,82.91) | 1.29(1.18,1.40) |
| Guatemala | 375.35(154.74,773.19) | 1545.99(652.51,3130.38) | 4.95(4.76,5.14) | 20.91(18.79,23.23) | 30.88(29.34,32.48) | 1.17(1.02,1.31) |
| Guinea | 82.71(34.04,171.86) | 284.97(117.10,590.27) | 4.00(3.86,4.15) | 5.88(4.66,7.35) | 9.20(8.13,10.38) | 1.26(1.08,1.44) |
| Guinea-Bissau | 13.93(5.85,28.97) | 46.08(19.26,93.61) | 4.02(3.70,4.34) | 5.91(3.15,10.50) | 9.25(6.70,12.62) | 1.30(0.96,1.64) |
| Guyana | 31.95(12.89,63.27) | 48.65(19.85,99.60) | 1.22(1.12,1.32) | 15.49(10.45,22.54) | 23.12(17.04,30.74) | 1.34(1.20,1.48) |
| Haiti | 172.94(72.55,361.08) | 502.83(210.37,1026.60) | 3.88(3.75,4.01) | 11.20(9.56,13.08) | 14.55(13.29,15.90) | 0.95(0.90,1.00) |
| Honduras | 212.16(88.86,428.01) | 868.27(365.26,1766.26) | 4.98(4.81,5.15) | 20.05(17.35,23.11) | 31.81(29.70,34.04) | 1.54(1.41,1.67) |
| Hungary | 69.40(27.42,150.34) | 76.89(31.07,162.07) | 0.26(0.13,0.39) | 2.75(2.13,3.50) | 3.53(2.76,4.49) | 0.85(0.77,0.92) |
| Iceland | 32.42(13.73,66.41) | 49.91(20.54,101.22) | 1.57(1.46,1.67) | 49.64(34.01,70.32) | 62.90(46.58,83.49) | 0.88(0.82,0.95) |
| India | 21497.23(8967.82,43575.07) | 75653.35(31982.66,153071.70) | 4.77(4.61,4.93) | 10.61(10.47,10.76) | 20.51(20.37,20.66) | 2.57(2.39,2.75) |
| Indonesia | 10879.06(4649.39,21877.32) | 31991.97(13835.53,65504.92) | 3.91(3.75,4.07) | 22.64(22.20,23.07) | 45.44(44.94,45.94) | 2.60(2.51,2.68) |
| Islamic Republic of Iran | 3668.66(1534.23,7413.76) | 8929.67(3777.54,18166.90) | 4.02(3.29,4.76) | 27.82(26.89,28.78) | 38.37(37.56,39.20) | 1.72(1.28,2.15) |
| Iraq | 1166.29(473.98,2345.01) | 3896.56(1641.37,7946.47) | 4.29(4.18,4.41) | 30.27(28.50,32.14) | 34.41(33.32,35.52) | 0.66(0.50,0.81) |
| Ireland | 400.77(165.04,808.44) | 680.21(286.08,1377.09) | 2.02(1.75,2.30) | 45.63(41.26,50.34) | 58.17(53.77,62.86) | 0.79(0.67,0.92) |
| Israel | 478.71(202.85,955.56) | 1121.81(468.28,2268.40) | 2.76(2.55,2.98) | 39.28(35.82,43.01) | 51.92(48.92,55.07) | 0.86(0.74,0.98) |
| Italy | 19310.05(8316.44,38103.69) | 16198.17(7001.48,32405.66) | -0.73(-0.84,-0.61) | 135.17(133.26,137.09) | 131.63(129.52,133.77) | -0.34(-0.47,-0.22) |
| Jamaica | 104.28(42.65,213.44) | 188.95(78.36,387.42) | 1.98(1.80,2.16) | 17.32(14.05,21.23) | 24.35(21.00,28.10) | 1.10(1.00,1.19) |
| Japan | 31719.63(13328.26,65651.08) | 27022.66(11259.76,56914.41) | -0.59(-0.67,-0.51) | 99.44(98.33,100.56) | 106.46(105.13,107.79) | 0.21(0.15,0.28) |
| Jordan | 236.66(98.63,478.36) | 1054.85(446.12,2168.99) | 5.43(5.27,5.60) | 27.80(24.16,31.92) | 36.60(34.42,38.90) | 1.06(0.96,1.16) |
| Kazakhstan | 228.49(92.28,464.38) | 396.11(165.76,806.14) | 2.04(1.93,2.14) | 5.50(4.80,6.28) | 8.42(7.60,9.31) | 1.41(1.37,1.44) |
| Kenya | 425.62(178.12,874.34) | 1372.93(584.23,2802.43) | 3.96(3.86,4.06) | 8.38(7.55,9.29) | 10.54(9.97,11.13) | 0.68(0.58,0.79) |
| Kiribati | 3.96(1.64,7.83) | 10.14(4.32,20.48) | 3.28(2.97,3.59) | 20.96(5.45,60.47) | 32.39(15.55,61.09) | 1.30(1.00,1.60) |
| Kuwait | 172.85(70.46,345.72) | 661.37(277.30,1347.67) | 5.77(5.20,6.35) | 39.87(33.94,46.80) | 48.34(44.47,52.52) | 0.96(0.87,1.05) |
| Kyrgyzstan | 52.15(20.82,106.44) | 106.52(43.10,217.65) | 2.21(2.10,2.31) | 4.94(3.65,6.65) | 6.30(5.15,7.63) | 0.52(0.42,0.61) |
| Lao People's Democratic Republic | 186.96(80.28,373.33) | 734.54(315.13,1492.58) | 5.05(4.93,5.16) | 19.37(16.63,22.48) | 37.77(35.07,40.64) | 2.48(2.42,2.53) |
| Latvia | 20.72(8.27,42.32) | 17.96(7.40,36.74) | -0.36(-0.52,-0.19) | 3.19(1.96,4.95) | 4.42(2.55,7.33) | 1.22(1.13,1.31) |
| Lebanon | 230.89(97.96,473.26) | 537.13(225.56,1083.03) | 3.29(3.14,3.44) | 30.08(26.30,34.27) | 39.84(36.47,43.46) | 1.05(1.00,1.09) |
| Lesotho | 38.73(15.54,79.59) | 81.36(34.25,166.96) | 2.37(2.15,2.59) | 9.16(6.42,12.83) | 14.33(11.35,17.97) | 1.52(1.39,1.65) |
| Liberia | 29.45(11.76,61.27) | 128.61(54.59,263.07) | 5.50(5.24,5.76) | 6.82(4.53,9.99) | 10.35(8.61,12.36) | 1.58(1.49,1.68) |
| Libya | 309.03(128.24,623.44) | 767.93(313.71,1584.13) | 3.50(3.21,3.79) | 34.76(30.79,39.19) | 39.03(36.31,41.91) | 0.58(0.50,0.65) |
| Lithuania | 26.58(10.75,54.92) | 25.49(10.51,53.07) | -0.07(-0.29,0.15) | 2.87(1.88,4.22) | 4.23(2.72,6.39) | 1.49(1.38,1.59) |
| Luxembourg | 45.76(18.67,90.34) | 92.70(38.39,188.14) | 2.40(2.35,2.45) | 46.50(33.83,63.05) | 61.36(49.21,76.03) | 0.95(0.86,1.03) |
| Madagascar | 181.95(74.92,384.02) | 536.09(222.28,1091.10) | 3.84(3.77,3.91) | 6.82(5.83,7.96) | 8.09(7.40,8.82) | 0.63(0.57,0.70) |
| Malawi | 208.26(85.83,438.10) | 503.04(207.92,1033.32) | 3.13(2.96,3.30) | 9.44(8.15,10.91) | 10.86(9.89,11.91) | 0.55(0.42,0.67) |
| Malaysia | 1699.33(732.71,3461.06) | 5751.33(2386.94,11975.36) | 4.37(3.99,4.75) | 37.80(35.99,39.68) | 68.86(67.09,70.67) | 2.21(2.02,2.39) |
| Maldives | 10.02(4.30,20.10) | 61.70(25.57,126.12) | 7.43(7.00,7.85) | 21.01(9.53,42.59) | 53.96(41.14,69.89) | 4.00(3.67,4.33) |
| Mali | 95.50(39.95,194.88) | 414.71(170.08,853.01) | 5.06(4.90,5.21) | 5.01(4.03,6.17) | 8.33(7.52,9.23) | 1.53(1.27,1.78) |
| Malta | 40.91(17.04,82.48) | 58.16(24.17,117.34) | 1.14(0.91,1.36) | 43.35(30.94,59.43) | 60.57(45.65,79.57) | 1.09(0.90,1.28) |
| Marshall Islands | 1.75(0.72,3.55) | 4.57(1.92,9.35) | 2.96(2.53,3.39) | 17.74(1.43,102.12) | 31.03(9.41,77.08) | 1.71(1.49,1.92) |
| Mauritania | 40.91(16.65,84.31) | 128.08(52.27,265.03) | 3.54(3.24,3.84) | 8.70(6.17,12.08) | 12.67(10.53,15.18) | 0.92(0.67,1.17) |
| Mauritius | 114.39(48.35,232.95) | 201.50(86.48,416.59) | 1.95(1.70,2.21) | 37.70(31.04,45.54) | 62.65(54.24,72.04) | 1.85(1.74,1.97) |
| Mexico | 12124.88(5177.92,24782.46) | 19292.67(8246.32,38795.34) | 0.82(0.60,1.04) | 55.24(54.23,56.26) | 56.89(56.09,57.70) | -0.62(-0.82,-0.42) |
| Federated States of Micronesia | 5.51(2.30,11.28) | 9.15(3.84,18.93) | 1.34(0.94,1.74) | 23.72(7.81,61.35) | 35.13(16.06,67.78) | 1.15(0.89,1.41) |
| Principality of Monaco | 3.57(1.50,7.16) | 4.41(1.84,8.81) | 0.83(0.75,0.91) | 51.34(11.64,169.20) | 61.68(17.07,164.78) | 0.59(0.50,0.68) |
| Mongolia | 24.26(10.01,50.44) | 66.04(26.89,139.05) | 3.67(3.52,3.82) | 4.74(2.97,7.40) | 7.25(5.58,9.31) | 1.46(1.41,1.52) |
| Montenegro | 4.15(1.66,8.51) | 5.14(2.09,10.71) | 0.84(0.80,0.87) | 2.66(0.75,6.83) | 3.53(1.15,8.55) | 1.13(1.02,1.24) |
| Morocco | 1640.38(682.95,3330.33) | 3367.98(1399.91,6916.08) | 2.61(2.49,2.73) | 25.74(24.48,27.06) | 35.13(33.95,36.34) | 1.17(1.12,1.22) |
| Mozambique | 201.05(80.67,408.20) | 733.58(298.77,1485.42) | 4.38(4.19,4.56) | 6.62(5.72,7.63) | 10.37(9.61,11.19) | 1.54(1.43,1.66) |
| Myanmar | 1821.15(766.40,3683.82) | 5910.43(2454.13,12136.79) | 4.54(4.37,4.72) | 17.81(16.98,18.67) | 39.47(38.47,40.49) | 3.21(3.05,3.38) |
| Namibia | 33.04(13.52,67.36) | 87.79(36.59,177.32) | 3.14(2.85,3.44) | 9.79(6.62,14.19) | 13.58(10.86,16.82) | 0.98(0.81,1.15) |
| Republic of Nauru | 0.68(0.28,1.42) | 1.15(0.48,2.35) | 1.45(1.25,1.65) | 27.87(0.14,253.01) | 41.18(1.51,239.18) | 1.15(1.04,1.25) |
| Nepal | 255.86(107.32,526.29) | 931.00(385.99,1903.04) | 4.59(4.55,4.63) | 5.63(4.95,6.39) | 10.53(9.86,11.24) | 2.16(2.10,2.22) |
| Netherlands | 1624.96(670.43,3283.19) | 1925.53(799.60,3893.98) | 0.46(0.37,0.56) | 40.77(38.80,42.82) | 51.99(49.66,54.40) | 0.79(0.72,0.86) |
| New Zealand | 800.33(342.88,1631.47) | 912.81(391.59,1894.81) | 0.28(0.22,0.34) | 88.33(82.31,94.69) | 90.15(84.34,96.28) | -0.14(-0.22,-0.06) |
| Nicaragua | 209.87(88.28,432.30) | 612.89(258.58,1235.35) | 3.62(3.34,3.90) | 23.22(20.05,26.84) | 34.46(31.78,37.32) | 1.27(1.13,1.40) |
| Niger | 93.17(39.27,190.36) | 351.61(144.71,733.45) | 4.47(4.28,4.66) | 5.40(4.33,6.70) | 7.30(6.52,8.17) | 0.93(0.76,1.11) |
| Nigeria | 1483.55(619.02,3048.88) | 5679.77(2397.73,11749.21) | 4.34(4.03,4.64) | 7.48(7.09,7.90) | 10.79(10.51,11.09) | 0.92(0.68,1.16) |
| Republic of Niue | 0.15(0.06,0.31) | 0.18(0.07,0.37) | 0.15(-0.06,0.36) | 30.80(0.00,888.93) | 48.09(0.00,1209.19) | 1.52(1.29,1.74) |
| North Macedonia | 11.19(4.24,23.58) | 16.50(6.70,33.91) | 1.47(1.32,1.63) | 2.17(1.09,3.89) | 3.15(1.80,5.27) | 1.36(1.28,1.43) |
| Northern Mariana Islands | 4.90(2.05,10.15) | 4.36(1.81,8.97) | -1.08(-2.39,0.24) | 34.89(10.64,97.03) | 45.88(11.81,140.32) | 0.78(0.57,1.00) |
| Norway | 594.25(248.52,1222.34) | 716.54(312.03,1458.51) | 0.75(0.66,0.83) | 56.20(51.76,60.94) | 59.43(55.11,64.03) | 0.29(0.26,0.32) |
| Oman | 82.72(35.01,167.51) | 409.38(174.25,845.18) | 5.87(5.71,6.04) | 24.22(19.15,30.45) | 42.01(37.95,46.44) | 2.09(1.99,2.19) |
| Pakistan | 2379.76(979.20,4784.49) | 6457.68(2694.85,13008.88) | 3.56(3.35,3.77) | 10.19(9.78,10.62) | 11.77(11.48,12.06) | 0.54(0.34,0.75) |
| Republic of Palau | 1.34(0.58,2.74) | 1.84(0.77,3.79) | 0.60(-0.01,1.22) | 32.41(1.76,171.71) | 48.09(4.49,208.79) | 1.23(1.00,1.46) |
| Palestine | 112.74(46.15,227.28) | 410.19(168.24,849.26) | 4.75(4.63,4.87) | 25.41(20.72,31.00) | 32.55(29.41,35.96) | 0.86(0.80,0.92) |
| Panama | 129.92(54.27,263.19) | 370.07(153.19,753.59) | 3.37(3.25,3.49) | 21.10(17.57,25.21) | 35.59(32.06,39.42) | 1.57(1.46,1.68) |
| Papua New Guinea | 161.89(68.26,328.11) | 639.43(274.22,1304.73) | 4.66(4.41,4.90) | 16.68(14.15,19.59) | 25.48(23.53,27.56) | 1.20(0.98,1.43) |
| Paraguay | 54.22(22.54,112.43) | 175.13(72.43,360.65) | 4.36(4.25,4.47) | 5.78(4.32,7.63) | 9.55(8.18,11.09) | 1.94(1.88,2.00) |
| Peru | 1884.35(800.30,3751.92) | 4547.37(1925.26,9024.99) | 3.13(3.09,3.18) | 34.64(33.06,36.29) | 50.90(49.43,52.40) | 1.40(1.35,1.44) |
| Philippines | 3808.75(1619.74,7748.91) | 12475.76(5361.99,25278.98) | 4.54(4.38,4.70) | 24.65(23.86,25.47) | 43.65(42.88,44.43) | 2.35(2.21,2.48) |
| Poland | 380.06(156.00,782.15) | 382.70(164.98,778.68) | -0.09(-0.24,0.06) | 4.01(3.61,4.45) | 4.29(3.85,4.77) | 0.19(0.16,0.23) |
| Portugal | 977.37(408.59,1971.45) | 1282.75(542.28,2618.35) | 0.63(0.24,1.01) | 38.76(36.36,41.27) | 54.31(51.26,57.51) | 0.90(0.66,1.14) |
| Puerto Rico | 272.76(112.49,554.12) | 301.73(124.78,603.20) | 0.31(0.07,0.55) | 28.49(25.21,32.09) | 37.41(33.27,41.96) | 0.93(0.83,1.03) |
| Qatar | 31.71(12.87,65.29) | 217.30(90.86,434.78) | 7.70(7.29,8.10) | 39.54(26.65,57.99) | 46.88(40.45,54.22) | 0.68(0.60,0.75) |
| Republic of Korea | 4142.33(1713.34,8679.21) | 6631.50(2786.81,14056.39) | 1.16(0.77,1.55) | 32.56(31.57,33.58) | 53.28(51.96,54.63) | 1.27(0.90,1.63) |
| Republic of Moldova | 28.06(11.02,57.27) | 35.78(14.87,73.11) | 0.84(0.77,0.90) | 2.47(1.64,3.60) | 3.91(2.70,5.57) | 1.66(1.49,1.83) |
| Romania | 127.58(49.90,260.18) | 140.83(56.37,289.01) | 0.31(0.11,0.52) | 2.27(1.89,2.71) | 3.35(2.80,3.99) | 1.42(1.37,1.47) |
| Russian Federation | 1172.45(476.49,2368.46) | 1529.08(644.98,3113.73) | 0.80(0.65,0.95) | 3.11(2.93,3.29) | 4.35(4.13,4.59) | 1.15(1.11,1.18) |
| Rwanda | 131.01(54.09,266.80) | 348.81(145.72,708.37) | 4.11(3.69,4.53) | 8.13(6.75,9.78) | 10.53(9.44,11.74) | 0.93(0.80,1.05) |
| Saint Kitts and Nevis | 2.09(0.87,4.29) | 4.49(1.90,9.07) | 2.64(2.37,2.91) | 20.62(2.28,102.52) | 28.99(8.61,73.06) | 1.04(0.91,1.16) |
| Saint Lucia | 5.80(2.45,11.88) | 10.87(4.54,22.23) | 1.91(1.58,2.25) | 16.84(5.77,41.46) | 23.40(11.56,42.78) | 0.83(0.63,1.03) |
| Saint Vincent and the Grenadines | 4.01(1.67,8.12) | 6.73(2.80,13.56) | 1.76(1.58,1.94) | 15.10(3.80,46.13) | 24.02(9.41,50.66) | 1.62(1.50,1.74) |
| Samoa | 10.64(4.32,22.50) | 20.05(8.45,41.03) | 1.90(1.71,2.10) | 28.83(13.70,55.58) | 39.85(24.16,62.56) | 0.97(0.78,1.15) |
| Republic of San Marino | 2.90(1.22,5.92) | 4.70(1.92,9.31) | 1.69(1.45,1.94) | 48.95(9.65,151.32) | 59.31(17.77,151.22) | 0.65(0.53,0.77) |
| Sao Tome and Principe | 1.80(0.74,3.68) | 5.73(2.34,11.86) | 3.83(3.54,4.12) | 7.09(0.60,34.12) | 10.83(3.79,25.37) | 1.23(0.97,1.49) |
| Saudi Arabia | 1058.13(433.33,2168.33) | 4541.47(1898.80,9289.59) | 5.49(5.38,5.59) | 31.74(29.78,33.81) | 46.04(44.69,47.42) | 1.42(1.38,1.46) |
| Senegal | 134.71(55.23,276.77) | 377.00(158.46,777.73) | 3.25(2.98,3.52) | 7.85(6.53,9.39) | 10.15(9.13,11.27) | 0.59(0.42,0.76) |
| Serbia | 51.34(20.38,106.56) | 62.03(24.71,126.39) | 0.52(0.40,0.63) | 2.27(1.69,2.99) | 3.17(2.42,4.09) | 1.29(1.22,1.37) |
| Seychelles | 7.36(3.10,14.53) | 14.17(6.01,28.78) | 2.18(1.91,2.44) | 40.41(16.02,89.73) | 58.37(31.83,99.33) | 1.14(1.07,1.21) |
| Sierra Leone | 49.86(20.54,101.23) | 220.47(89.47,454.36) | 5.38(5.23,5.53) | 5.78(4.25,7.76) | 10.37(9.00,11.92) | 1.76(1.59,1.93) |
| Singapore | 352.20(145.22,741.17) | 959.30(401.14,2020.40) | 3.66(3.34,3.99) | 36.97(33.18,41.10) | 63.15(58.94,67.66) | 1.89(1.70,2.07) |
| Slovakia | 31.18(11.90,65.92) | 43.52(17.03,89.08) | 1.04(0.88,1.19) | 2.35(1.59,3.35) | 3.39(2.42,4.68) | 1.20(1.16,1.24) |
| Slovenia | 12.35(5.00,25.61) | 15.39(6.37,31.53) | 0.76(0.53,0.99) | 2.47(1.29,4.35) | 3.59(1.97,6.23) | 1.33(1.22,1.43) |
| Solomon Islands | 13.08(5.56,25.99) | 46.72(19.24,94.22) | 4.19(3.75,4.63) | 17.48(8.99,31.93) | 28.46(20.84,38.13) | 1.46(1.14,1.79) |
| Somalia | 102.07(41.33,209.35) | 364.98(148.71,756.84) | 4.49(4.41,4.57) | 6.73(5.47,8.21) | 8.04(7.21,8.95) | 0.75(0.69,0.80) |
| South Africa | 1374.59(574.52,2828.10) | 2863.46(1209.31,5781.92) | 2.59(2.37,2.80) | 13.99(13.24,14.78) | 18.80(18.12,19.51) | 1.08(1.02,1.14) |
| South Sudan | 96.16(39.63,200.46) | 184.57(75.68,374.78) | 2.23(1.89,2.56) | 7.50(6.01,9.33) | 8.49(7.28,9.85) | 0.21(0.07,0.36) |
| Spain | 4021.39(1684.52,8036.43) | 5599.42(2329.00,11270.09) | 1.23(0.83,1.63) | 41.79(40.51,43.11) | 55.20(53.68,56.76) | 0.82(0.64,1.00) |
| Sri Lanka | 1387.40(587.70,2914.52) | 2931.82(1214.35,5923.29) | 2.79(2.43,3.15) | 30.07(28.50,31.72) | 52.64(50.74,54.59) | 2.19(1.92,2.47) |
| Sudan | 743.45(311.67,1544.92) | 3186.87(1313.31,6660.94) | 5.03(4.82,5.23) | 15.74(14.60,16.96) | 29.88(28.83,30.95) | 2.19(1.99,2.39) |
| Suriname | 17.28(7.21,35.80) | 36.46(15.14,76.19) | 2.81(2.58,3.04) | 17.77(10.30,28.97) | 25.18(17.67,34.87) | 1.14(1.10,1.17) |
| Sweden | 702.80(302.02,1430.64) | 920.13(389.91,1910.16) | 0.67(0.40,0.94) | 34.35(31.83,37.03) | 42.23(39.50,45.11) | 0.39(0.18,0.59) |
| Switzerland | 795.95(333.33,1616.40) | 1016.78(420.69,2069.95) | 0.92(0.88,0.96) | 44.92(41.82,48.23) | 51.92(48.68,55.34) | 0.49(0.47,0.51) |
| Syrian Arab Republic | 707.55(290.95,1437.15) | 1362.74(575.05,2789.98) | 2.43(1.66,3.20) | 25.32(23.39,27.38) | 34.56(32.68,36.55) | 1.17(1.07,1.28) |
| Taiwan (Province of China) | 1345.62(563.97,2723.36) | 2386.45(1014.73,4862.65) | 2.12(2.00,2.24) | 24.26(22.97,25.62) | 41.38(39.67,43.15) | 2.04(1.95,2.13) |
| Tajikistan | 47.36(19.59,97.67) | 134.30(55.89,273.82) | 3.74(3.63,3.86) | 3.92(2.81,5.43) | 5.43(4.54,6.45) | 1.05(0.95,1.15) |
| Thailand | 4623.85(1979.02,9563.33) | 10644.55(4490.42,21683.54) | 2.92(2.56,3.28) | 28.75(27.92,29.60) | 59.53(58.38,60.70) | 2.57(2.37,2.78) |
| Timor-Leste | 34.53(14.77,69.37) | 104.01(43.91,214.66) | 4.05(3.78,4.32) | 18.39(12.67,26.15) | 31.96(25.92,39.12) | 2.22(2.11,2.33) |
| Togo | 51.86(21.89,108.77) | 199.29(81.24,413.62) | 4.46(4.17,4.74) | 6.11(4.51,8.19) | 9.73(8.42,11.21) | 1.33(1.12,1.54) |
| Tokelau | 0.09(0.04,0.18) | 0.13(0.05,0.27) | 0.84(0.46,1.21) | 25.26(0.00,1521.63) | 42.69(0.00,1835.07) | 1.71(1.52,1.90) |
| Tonga | 7.42(3.12,15.10) | 11.76(5.03,23.96) | 1.29(0.95,1.62) | 33.15(13.31,70.61) | 47.02(24.00,83.48) | 0.83(0.54,1.12) |
| Trinidad and Tobago | 55.91(22.60,113.68) | 93.60(37.94,191.22) | 1.87(1.51,2.22) | 18.02(13.58,23.59) | 27.54(22.16,33.92) | 1.55(1.39,1.70) |
| Tunisia | 526.02(223.69,1069.96) | 1109.63(472.97,2282.68) | 2.79(2.53,3.04) | 25.33(23.16,27.68) | 36.32(34.19,38.56) | 1.42(1.37,1.48) |
| Turkey | 3619.69(1535.27,7334.51) | 7648.93(3202.23,15653.94) | 2.69(2.60,2.78) | 24.32(23.52,25.14) | 34.53(33.76,35.32) | 1.37(1.32,1.43) |
| Turkmenistan | 45.65(18.43,96.01) | 99.09(39.94,202.01) | 2.60(2.44,2.76) | 5.12(3.67,7.08) | 7.97(6.48,9.71) | 1.46(1.41,1.50) |
| Tuvalu | 0.57(0.24,1.14) | 1.07(0.45,2.21) | 2.00(1.87,2.12) | 23.22(0.05,212.08) | 38.05(1.15,217.74) | 1.47(1.24,1.71) |
| Uganda | 294.62(118.39,620.26) | 975.68(399.72,2019.18) | 4.17(4.09,4.25) | 7.69(6.78,8.70) | 9.97(9.32,10.65) | 0.85(0.80,0.90) |
| Ukraine | 375.98(153.78,769.98) | 409.55(162.38,850.54) | 0.31(0.20,0.42) | 2.94(2.65,3.25) | 3.82(3.44,4.23) | 0.93(0.83,1.03) |
| United Arab Emirates | 111.72(45.50,225.08) | 720.53(302.73,1458.64) | 7.59(6.92,8.27) | 31.82(25.91,39.15) | 42.83(39.34,46.59) | 1.04(0.89,1.19) |
| United Kingdom of Great Britain and Northern Ireland | 7174.34(3060.91,14758.09) | 9613.84(4098.54,19726.88) | 0.86(0.70,1.01) | 50.09(48.93,51.27) | 63.51(62.23,64.81) | 0.58(0.40,0.75) |
| United Republic of Tanzania | 540.46(222.18,1137.50) | 1592.05(662.03,3286.66) | 3.66(3.54,3.79) | 9.04(8.25,9.89) | 11.34(10.78,11.93) | 0.74(0.62,0.85) |
| United States of America | 34472.06(14741.09,71634.76) | 41009.05(18415.69,78808.89) | -0.57(-1.01,-0.13) | 50.90(50.36,51.44) | 54.80(54.27,55.34) | -0.88(-1.31,-0.44) |
| United States Virgin Islands | 7.82(3.20,16.06) | 8.01(3.32,16.22) | -0.01(-0.22,0.21) | 27.44(11.63,55.58) | 35.76(15.20,72.62) | 0.85(0.72,0.98) |
| Uruguay | 139.12(57.66,285.06) | 269.84(113.92,555.30) | 2.29(2.02,2.55) | 18.56(15.60,21.91) | 32.26(28.51,36.39) | 1.94(1.71,2.17) |
| Uzbekistan | 255.55(106.96,524.91) | 714.45(290.46,1461.50) | 3.48(3.39,3.57) | 5.18(4.53,5.93) | 7.87(7.30,8.47) | 1.27(1.09,1.45) |
| Vanuatu | 7.34(3.04,14.56) | 23.18(9.73,47.27) | 4.05(3.93,4.17) | 20.78(8.30,46.09) | 31.25(19.72,47.78) | 1.35(1.28,1.41) |
| Bolivarian Republic of Venezuela | 1499.76(638.10,3060.98) | 2974.69(1260.45,5991.70) | 2.43(2.19,2.68) | 30.67(29.10,32.30) | 40.49(39.05,41.98) | 0.79(0.70,0.87) |
| Socialist Republic of Viet Nam | 2846.72(1189.02,5727.18) | 9376.41(3873.55,19304.60) | 4.78(4.52,5.05) | 16.60(15.96,17.25) | 35.51(34.79,36.25) | 3.16(2.95,3.37) |
| Yemen | 455.79(192.05,914.98) | 1641.06(693.73,3294.60) | 4.98(4.83,5.14) | 16.47(14.95,18.14) | 20.88(19.86,21.94) | 1.17(1.00,1.34) |
| Zambia | 191.47(75.98,392.89) | 595.11(242.45,1227.91) | 3.73(3.60,3.87) | 10.46(8.94,12.20) | 12.95(11.89,14.10) | 0.49(0.39,0.58) |
| Zimbabwe | 267.60(107.23,544.24) | 483.80(200.07,967.57) | 1.28(0.93,1.64) | 11.18(9.81,12.72) | 12.26(11.17,13.44) | -0.17(-0.42,0.08) |

**Table S6. Age distribution of Incidence rate for PCOS in women of reproductive age in different countries in 2019.**

| Incidence | 15-19 years | 20-24 years | 25-29 years | 30-34 years | 35-39 years | 40-44 years | 45-49 years |
| --- | --- | --- | --- | --- | --- | --- | --- |
| Afghanistan | 249.87 | 10.46 | 6.37 | 3.86 | 2.93 | 1.97 | 1.06 |
| Albania | 36.95 | 4.70 | 2.86 | 1.75 | 1.36 | 0.91 | 0.48 |
| Algeria | 415.92 | 10.28 | 6.30 | 3.85 | 2.93 | 1.95 | 1.04 |
| American Samoa | 515.59 | 11.99 | 7.16 | 4.21 | 3.16 | 2.09 | 1.10 |
| Andorra | 696.39 | 8.87 | 5.27 | 3.08 | 2.31 | 1.52 | 0.81 |
| Angola | 146.30 | 14.01 | 8.16 | 4.65 | 3.48 | 2.28 | 1.21 |
| Antigua and Barbuda | 267.83 | 11.52 | 6.87 | 4.06 | 3.07 | 2.04 | 1.09 |
| Argentina | 493.79 | 10.20 | 5.98 | 3.44 | 2.58 | 1.69 | 0.89 |
| Armenia | 97.76 | 9.15 | 5.49 | 3.25 | 2.44 | 1.61 | 0.87 |
| Australia | 1336.76 | 8.15 | 4.90 | 2.93 | 2.25 | 1.51 | 0.82 |
| Austria | 736.44 | 8.86 | 5.27 | 3.09 | 2.35 | 1.56 | 0.82 |
| Azerbaijan | 101.04 | 9.27 | 5.56 | 3.29 | 2.48 | 1.63 | 0.87 |
| Commonwealth of the Bahamas | 303.31 | 11.53 | 6.95 | 4.16 | 3.14 | 2.09 | 1.11 |
| Bahrain | 451.08 | 10.17 | 6.23 | 3.81 | 2.92 | 1.96 | 1.05 |
| Bangladesh | 129.33 | 11.38 | 6.87 | 4.11 | 3.10 | 2.04 | 1.08 |
| Barbados | 295.47 | 11.50 | 6.87 | 4.07 | 3.09 | 2.06 | 1.11 |
| Belarus | 54.70 | 9.15 | 5.48 | 3.25 | 2.48 | 1.65 | 0.86 |
| Belgium | 700.65 | 8.74 | 5.24 | 3.12 | 2.37 | 1.58 | 0.84 |
| Belize | 291.62 | 11.58 | 6.97 | 4.15 | 3.13 | 2.08 | 1.11 |
| Benin | 171.36 | 14.44 | 8.21 | 4.53 | 3.37 | 2.22 | 1.19 |
| Bermuda | 332.25 | 11.49 | 6.94 | 4.16 | 3.15 | 2.09 | 1.10 |
| Bhutan | 201.77 | 11.70 | 6.99 | 4.13 | 3.11 | 2.07 | 1.12 |
| Plurinational State of Bolivia | 475.67 | 10.77 | 6.51 | 3.90 | 2.95 | 1.99 | 1.09 |
| Bosnia and Herzegovina | 36.92 | 4.73 | 2.87 | 1.74 | 1.34 | 0.89 | 0.47 |
| Botswana | 226.66 | 14.36 | 8.37 | 4.77 | 3.55 | 2.33 | 1.25 |
| Brazil | 114.52 | 14.75 | 8.86 | 5.25 | 3.93 | 2.58 | 1.37 |
| Brunei Darussalam | 1426.63 | 8.69 | 5.10 | 2.95 | 2.24 | 1.48 | 0.79 |
| Bulgaria | 41.46 | 4.74 | 2.94 | 1.84 | 1.43 | 0.98 | 0.54 |
| Burkina Faso | 142.04 | 14.19 | 8.19 | 4.59 | 3.41 | 2.22 | 1.18 |
| Burundi | 94.49 | 13.65 | 7.94 | 4.53 | 3.40 | 2.24 | 1.17 |
| Republic of Cabo Verde | 168.10 | 14.37 | 8.20 | 4.53 | 3.37 | 2.21 | 1.17 |
| Cambodia | 402.19 | 12.18 | 7.31 | 4.33 | 3.23 | 2.12 | 1.13 |
| Cameroon | 187.99 | 14.50 | 8.28 | 4.58 | 3.42 | 2.24 | 1.19 |
| Canada | 546.93 | 7.31 | 4.03 | 2.13 | 1.61 | 1.06 | 0.55 |
| Central African Republic | 114.84 | 13.85 | 8.12 | 4.66 | 3.47 | 2.26 | 1.18 |
| Chad | 103.07 | 13.41 | 7.81 | 4.45 | 3.32 | 2.18 | 1.15 |
| Chile | 594.51 | 10.27 | 5.96 | 3.39 | 2.55 | 1.68 | 0.89 |
| China | 306.87 | 18.52 | 10.75 | 6.08 | 4.52 | 2.96 | 1.58 |
| Colombia | 336.57 | 10.25 | 6.21 | 3.73 | 2.82 | 1.87 | 1.01 |
| Comoros | 157.42 | 14.23 | 8.28 | 4.70 | 3.49 | 2.27 | 1.18 |
| Congo | 160.90 | 14.13 | 8.12 | 4.54 | 3.37 | 2.19 | 1.15 |
| Cook Islands | 558.66 | 11.98 | 7.11 | 4.15 | 3.11 | 2.05 | 1.10 |
| Costa Rica | 407.25 | 10.03 | 6.11 | 3.71 | 2.82 | 1.88 | 1.01 |
| Croatia | 40.44 | 4.75 | 2.92 | 1.81 | 1.40 | 0.95 | 0.51 |
| Cuba | 288.56 | 11.49 | 6.89 | 4.10 | 3.09 | 2.05 | 1.08 |
| Cyprus | 652.93 | 8.95 | 5.32 | 3.13 | 2.38 | 1.58 | 0.83 |
| Czech Republic | 39.92 | 4.75 | 2.90 | 1.77 | 1.37 | 0.93 | 0.51 |
| Republic of C么te d'Ivoire | 156.44 | 14.02 | 8.08 | 4.52 | 3.33 | 2.15 | 1.14 |
| Democratic People's Republic of Korea | 190.36 | 11.07 | 6.79 | 4.16 | 3.19 | 2.15 | 1.15 |
| Democratic Republic of the Congo | 127.93 | 13.87 | 8.11 | 4.62 | 3.40 | 2.19 | 1.13 |
| Denmark | 662.22 | 8.88 | 5.25 | 3.07 | 2.36 | 1.58 | 0.85 |
| Djibouti | 177.17 | 14.42 | 8.32 | 4.68 | 3.48 | 2.27 | 1.19 |
| Dominica | 273.50 | 11.66 | 6.97 | 4.12 | 3.09 | 2.05 | 1.10 |
| Dominican Republic | 276.01 | 11.40 | 6.82 | 4.04 | 3.06 | 2.04 | 1.09 |
| Ecuador | 580.37 | 10.69 | 6.41 | 3.81 | 2.88 | 1.91 | 1.02 |
| Egypt | 435.52 | 10.29 | 6.35 | 3.90 | 2.95 | 1.96 | 1.05 |
| El Salvador | 362.08 | 9.99 | 6.09 | 3.69 | 2.78 | 1.85 | 1.00 |
| Equatorial Guinea | 223.84 | 14.27 | 8.18 | 4.57 | 3.43 | 2.25 | 1.20 |
| Eritrea | 117.29 | 13.93 | 8.07 | 4.58 | 3.44 | 2.27 | 1.20 |
| Estonia | 62.16 | 9.16 | 5.44 | 3.18 | 2.36 | 1.54 | 0.82 |
| Kingdom of Eswatini | 236.17 | 14.52 | 8.31 | 4.62 | 3.44 | 2.26 | 1.21 |
| Ethiopia | 118.93 | 21.62 | 12.25 | 6.69 | 4.94 | 3.20 | 1.68 |
| Fiji | 453.26 | 12.24 | 7.26 | 4.23 | 3.16 | 2.08 | 1.11 |
| Finland | 650.75 | 8.93 | 5.30 | 3.10 | 2.35 | 1.56 | 0.84 |
| France | 610.42 | 9.07 | 5.36 | 3.12 | 2.35 | 1.54 | 0.81 |
| Gabon | 196.50 | 14.25 | 8.17 | 4.55 | 3.37 | 2.20 | 1.18 |
| Republic of the Gambia | 141.72 | 14.06 | 8.16 | 4.62 | 3.43 | 2.23 | 1.17 |
| Georgia | 142.96 | 9.39 | 5.57 | 3.26 | 2.44 | 1.62 | 0.86 |
| Germany | 609.97 | 9.06 | 5.36 | 3.12 | 2.36 | 1.57 | 0.84 |
| Ghana | 146.65 | 14.13 | 8.14 | 4.55 | 3.38 | 2.21 | 1.17 |
| Greece | 710.18 | 8.81 | 5.23 | 3.06 | 2.29 | 1.49 | 0.78 |
| Greenland | 477.21 | 7.51 | 4.21 | 2.29 | 1.75 | 1.17 | 0.63 |
| Grenada | 247.23 | 11.55 | 6.96 | 4.15 | 3.12 | 2.06 | 1.09 |
| Guam | 569.27 | 11.96 | 7.16 | 4.23 | 3.19 | 2.11 | 1.12 |
| Guatemala | 310.58 | 10.24 | 6.24 | 3.78 | 2.86 | 1.89 | 0.99 |
| Guinea | 129.04 | 13.95 | 8.07 | 4.53 | 3.32 | 2.13 | 1.12 |
| Guinea-Bissau | 128.70 | 14.09 | 8.14 | 4.58 | 3.42 | 2.24 | 1.19 |
| Guyana | 253.32 | 11.58 | 6.98 | 4.17 | 3.13 | 2.05 | 1.08 |
| Haiti | 171.76 | 11.41 | 6.88 | 4.12 | 3.13 | 2.09 | 1.11 |
| Honduras | 317.82 | 10.15 | 6.21 | 3.78 | 2.87 | 1.92 | 1.04 |
| Hungary | 41.19 | 4.77 | 2.93 | 1.81 | 1.41 | 0.96 | 0.52 |
| Iceland | 720.76 | 8.72 | 5.16 | 3.02 | 2.30 | 1.53 | 0.82 |
| India | 239.61 | 18.80 | 10.82 | 6.04 | 4.48 | 2.92 | 1.55 |
| Indonesia | 589.29 | 19.34 | 11.13 | 6.22 | 4.61 | 3.01 | 1.59 |
| Islamic Republic of Iran | 436.91 | 17.11 | 9.95 | 5.65 | 4.21 | 2.77 | 1.48 |
| Iraq | 380.76 | 10.46 | 6.41 | 3.91 | 2.97 | 1.97 | 1.06 |
| Ireland | 678.67 | 9.02 | 5.36 | 3.14 | 2.38 | 1.59 | 0.85 |
| Israel | 623.76 | 9.12 | 5.38 | 3.12 | 2.34 | 1.53 | 0.82 |
| Italy | 1219.38 | 12.21 | 7.18 | 4.13 | 3.09 | 2.03 | 1.08 |
| Jamaica | 263.39 | 11.66 | 7.04 | 4.22 | 3.18 | 2.11 | 1.14 |
| Japan | 2436.85 | 13.69 | 7.78 | 4.26 | 3.18 | 2.08 | 1.11 |
| Jordan | 397.54 | 10.31 | 6.32 | 3.86 | 2.92 | 1.93 | 1.03 |
| Kazakhstan | 103.78 | 9.05 | 5.44 | 3.26 | 2.49 | 1.66 | 0.88 |
| Kenya | 144.71 | 22.53 | 12.68 | 6.82 | 5.01 | 3.24 | 1.71 |
| Kiribati | 382.79 | 12.36 | 7.27 | 4.19 | 3.13 | 2.05 | 1.09 |
| Kuwait | 496.93 | 10.13 | 6.26 | 3.86 | 2.92 | 1.94 | 1.04 |
| Kyrgyzstan | 79.72 | 9.03 | 5.44 | 3.26 | 2.48 | 1.65 | 0.87 |
| Lao People's Democratic Republic | 484.37 | 11.98 | 7.17 | 4.22 | 3.14 | 2.05 | 1.08 |
| Latvia | 57.10 | 9.04 | 5.40 | 3.20 | 2.43 | 1.61 | 0.85 |
| Lebanon | 431.05 | 10.22 | 6.28 | 3.84 | 2.91 | 1.93 | 1.03 |
| Lesotho | 193.73 | 14.17 | 8.30 | 4.76 | 3.54 | 2.32 | 1.23 |
| Liberia | 145.50 | 14.11 | 8.11 | 4.53 | 3.37 | 2.19 | 1.15 |
| Libya | 424.49 | 10.44 | 6.35 | 3.83 | 2.89 | 1.91 | 1.02 |
| Lithuania | 54.41 | 9.00 | 5.40 | 3.20 | 2.41 | 1.59 | 0.84 |
| Luxembourg | 712.83 | 8.90 | 5.28 | 3.08 | 2.33 | 1.54 | 0.82 |
| Madagascar | 111.91 | 14.07 | 8.20 | 4.67 | 3.49 | 2.29 | 1.21 |
| Malawi | 151.30 | 14.36 | 8.30 | 4.67 | 3.48 | 2.27 | 1.19 |
| Malaysia | 788.29 | 11.31 | 6.79 | 4.04 | 3.05 | 2.02 | 1.09 |
| Maldives | 646.70 | 11.75 | 7.03 | 4.15 | 3.12 | 2.05 | 1.07 |
| Mali | 117.27 | 13.91 | 8.09 | 4.61 | 3.45 | 2.26 | 1.18 |
| Malta | 701.66 | 8.79 | 5.18 | 3.00 | 2.26 | 1.48 | 0.77 |
| Marshall Islands | 367.72 | 12.37 | 7.34 | 4.29 | 3.23 | 2.12 | 1.12 |
| Mauritania | 170.73 | 14.26 | 8.20 | 4.59 | 3.42 | 2.24 | 1.19 |
| Mauritius | 730.23 | 11.50 | 6.91 | 4.09 | 3.06 | 2.01 | 1.07 |
| Mexico | 525.97 | 14.49 | 8.72 | 5.19 | 3.90 | 2.59 | 1.39 |
| Federated States of Micronesia | 407.97 | 12.29 | 7.24 | 4.21 | 3.18 | 2.10 | 1.11 |
| Principality of Monaco | 712.20 | 8.81 | 5.25 | 3.09 | 2.34 | 1.55 | 0.82 |
| Mongolia | 90.67 | 9.18 | 5.51 | 3.28 | 2.50 | 1.68 | 0.92 |
| Montenegro | 41.54 | 4.74 | 2.93 | 1.82 | 1.41 | 0.96 | 0.51 |
| Morocco | 386.28 | 10.30 | 6.28 | 3.80 | 2.87 | 1.90 | 1.00 |
| Mozambique | 144.89 | 14.32 | 8.30 | 4.70 | 3.50 | 2.30 | 1.23 |
| Myanmar | 500.09 | 11.99 | 7.20 | 4.26 | 3.18 | 2.08 | 1.09 |
| Namibia | 187.95 | 14.47 | 8.39 | 4.74 | 3.54 | 2.33 | 1.25 |
| Republic of Nauru | 464.49 | 12.05 | 7.15 | 4.16 | 3.10 | 2.03 | 1.08 |
| Nepal | 138.90 | 11.35 | 6.90 | 4.15 | 3.10 | 2.04 | 1.08 |
| Netherlands | 616.07 | 9.10 | 5.37 | 3.13 | 2.38 | 1.59 | 0.86 |
| New Zealand | 1492.61 | 13.57 | 7.87 | 4.45 | 3.34 | 2.19 | 1.15 |
| Nicaragua | 338.16 | 10.12 | 6.25 | 3.83 | 2.87 | 1.89 | 1.00 |
| Niger | 102.50 | 13.52 | 7.88 | 4.50 | 3.38 | 2.22 | 1.18 |
| Nigeria | 148.35 | 21.92 | 12.39 | 6.72 | 4.94 | 3.20 | 1.68 |
| Republic of Niue | 524.64 | 11.78 | 7.07 | 4.19 | 3.15 | 2.09 | 1.12 |
| North Macedonia | 37.65 | 4.70 | 2.92 | 1.82 | 1.43 | 0.97 | 0.51 |
| Northern Mariana Islands | 507.89 | 12.02 | 7.21 | 4.27 | 3.20 | 2.11 | 1.13 |
| Norway | 735.03 | 14.73 | 8.50 | 4.78 | 3.57 | 2.34 | 1.24 |
| Oman | 448.93 | 10.45 | 6.41 | 3.91 | 2.96 | 1.97 | 1.06 |
| Pakistan | 164.39 | 18.99 | 11.11 | 6.37 | 4.75 | 3.11 | 1.64 |
| Republic of Palau | 523.89 | 11.86 | 7.07 | 4.17 | 3.15 | 2.08 | 1.11 |
| Palestine | 364.87 | 10.44 | 6.38 | 3.87 | 2.90 | 1.90 | 1.00 |
| Panama | 347.66 | 10.09 | 6.14 | 3.71 | 2.81 | 1.86 | 0.99 |
| Papua New Guinea | 313.42 | 12.22 | 7.27 | 4.27 | 3.21 | 2.11 | 1.12 |
| Paraguay | 114.07 | 10.64 | 6.46 | 3.88 | 2.92 | 1.93 | 1.03 |
| Peru | 506.81 | 10.63 | 6.40 | 3.82 | 2.90 | 1.94 | 1.05 |
| Philippines | 579.64 | 19.31 | 11.06 | 6.14 | 4.54 | 2.96 | 1.57 |
| Poland | 45.48 | 4.20 | 2.58 | 1.60 | 1.24 | 0.84 | 0.45 |
| Portugal | 635.81 | 8.88 | 5.26 | 3.08 | 2.36 | 1.58 | 0.84 |
| Puerto Rico | 373.70 | 11.02 | 6.65 | 3.97 | 3.00 | 1.99 | 1.07 |
| Qatar | 487.62 | 10.27 | 6.30 | 3.85 | 2.92 | 1.92 | 1.00 |
| Republic of Korea | 1146.90 | 8.83 | 5.21 | 3.04 | 2.34 | 1.57 | 0.84 |
| Republic of Moldova | 49.81 | 8.94 | 5.35 | 3.17 | 2.40 | 1.60 | 0.86 |
| Romania | 39.80 | 4.75 | 2.91 | 1.78 | 1.39 | 0.95 | 0.50 |
| Russian Federation | 56.50 | 14.27 | 8.48 | 4.94 | 3.67 | 2.39 | 1.25 |
| Rwanda | 149.37 | 14.55 | 8.31 | 4.61 | 3.44 | 2.25 | 1.18 |
| Saint Kitts and Nevis | 305.49 | 11.32 | 6.79 | 4.04 | 3.05 | 2.03 | 1.09 |
| Saint Lucia | 255.89 | 11.38 | 6.81 | 4.04 | 3.05 | 2.02 | 1.08 |
| Saint Vincent and the Grenadines | 262.88 | 11.62 | 6.98 | 4.15 | 3.13 | 2.08 | 1.11 |
| Samoa | 450.44 | 12.04 | 7.18 | 4.23 | 3.18 | 2.11 | 1.12 |
| Republic of San Marino | 687.48 | 8.86 | 5.24 | 3.06 | 2.33 | 1.54 | 0.81 |
| Sao Tome and Principe | 153.14 | 14.24 | 8.17 | 4.55 | 3.37 | 2.19 | 1.15 |
| Saudi Arabia | 479.97 | 10.37 | 6.31 | 3.81 | 2.89 | 1.94 | 1.05 |
| Senegal | 140.47 | 14.10 | 8.13 | 4.56 | 3.40 | 2.21 | 1.15 |
| Serbia | 37.79 | 4.72 | 2.90 | 1.80 | 1.40 | 0.95 | 0.51 |
| Seychelles | 693.23 | 11.46 | 6.95 | 4.18 | 3.17 | 2.09 | 1.09 |
| Sierra Leone | 145.37 | 14.14 | 8.16 | 4.58 | 3.39 | 2.18 | 1.13 |
| Singapore | 1388.21 | 8.73 | 5.18 | 3.03 | 2.29 | 1.53 | 0.83 |
| Slovakia | 39.99 | 4.66 | 2.88 | 1.80 | 1.40 | 0.96 | 0.52 |
| Slovenia | 43.17 | 4.70 | 2.87 | 1.76 | 1.35 | 0.90 | 0.47 |
| Solomon Islands | 341.81 | 12.46 | 7.37 | 4.30 | 3.24 | 2.15 | 1.15 |
| Somalia | 112.64 | 14.02 | 8.20 | 4.70 | 3.53 | 2.31 | 1.20 |
| South Africa | 257.01 | 22.83 | 12.76 | 6.83 | 5.03 | 3.26 | 1.73 |
| South Sudan | 119.13 | 14.02 | 8.18 | 4.65 | 3.42 | 2.20 | 1.15 |
| Spain | 664.88 | 8.97 | 5.31 | 3.10 | 2.35 | 1.55 | 0.81 |
| Sri Lanka | 639.92 | 11.81 | 7.05 | 4.15 | 3.13 | 2.05 | 1.07 |
| Sudan | 346.03 | 10.51 | 6.45 | 3.95 | 3.00 | 2.02 | 1.09 |
| Suriname | 273.91 | 11.60 | 6.97 | 4.14 | 3.11 | 2.04 | 1.07 |
| Sweden | 536.05 | 15.25 | 8.75 | 4.87 | 3.64 | 2.37 | 1.23 |
| Switzerland | 618.14 | 9.03 | 5.32 | 3.08 | 2.33 | 1.55 | 0.82 |
| Syrian Arab Republic | 388.74 | 10.49 | 6.48 | 3.99 | 3.02 | 2.01 | 1.07 |
| Taiwan (Province of China) | 466.42 | 10.85 | 6.61 | 4.00 | 3.02 | 1.99 | 1.07 |
| Tajikistan | 69.65 | 8.91 | 5.37 | 3.21 | 2.43 | 1.61 | 0.87 |
| Thailand | 689.12 | 11.46 | 6.89 | 4.10 | 3.09 | 2.05 | 1.09 |
| Timor-Leste | 418.84 | 12.03 | 7.18 | 4.24 | 3.21 | 2.13 | 1.14 |
| Togo | 136.52 | 14.00 | 8.12 | 4.61 | 3.44 | 2.26 | 1.21 |
| Tokelau | 480.46 | 12.12 | 7.20 | 4.22 | 3.16 | 2.08 | 1.10 |
| Tonga | 517.85 | 12.00 | 7.10 | 4.14 | 3.13 | 2.08 | 1.10 |
| Trinidad and Tobago | 290.77 | 11.40 | 6.85 | 4.07 | 3.06 | 2.02 | 1.08 |
| Tunisia | 396.47 | 10.49 | 6.36 | 3.84 | 2.90 | 1.92 | 1.02 |
| Turkey | 387.98 | 10.35 | 6.33 | 3.85 | 2.89 | 1.91 | 1.02 |
| Turkmenistan | 97.71 | 9.24 | 5.53 | 3.29 | 2.50 | 1.67 | 0.89 |
| Tuvalu | 439.82 | 12.20 | 7.22 | 4.22 | 3.20 | 2.12 | 1.12 |
| Uganda | 138.92 | 14.45 | 8.29 | 4.61 | 3.42 | 2.23 | 1.17 |
| Ukraine | 48.68 | 13.64 | 8.20 | 4.85 | 3.61 | 2.35 | 1.23 |
| United Arab Emirates | 456.42 | 10.22 | 6.30 | 3.86 | 2.91 | 1.91 | 1.01 |
| United Kingdom of Great Britain and Northern Ireland | 766.20 | 13.52 | 7.84 | 4.43 | 3.31 | 2.17 | 1.15 |
| United Republic of Tanzania | 157.69 | 14.51 | 8.36 | 4.69 | 3.48 | 2.28 | 1.22 |
| United States of America | 1040.32 | 10.36 | 5.60 | 2.84 | 2.10 | 1.36 | 0.72 |
| United States Virgin Islands | 358.81 | 11.29 | 6.79 | 4.04 | 3.04 | 2.01 | 1.08 |
| Uruguay | 542.45 | 10.32 | 6.00 | 3.42 | 2.58 | 1.72 | 0.92 |
| Uzbekistan | 97.43 | 9.10 | 5.47 | 3.26 | 2.47 | 1.63 | 0.86 |
| Vanuatu | 368.09 | 12.25 | 7.30 | 4.30 | 3.26 | 2.18 | 1.17 |
| Bolivarian Republic of Venezuela | 382.91 | 9.92 | 6.10 | 3.74 | 2.84 | 1.89 | 1.01 |
| Socialist Republic of Viet Nam | 464.55 | 12.00 | 7.22 | 4.28 | 3.19 | 2.08 | 1.10 |
| Yemen | 252.39 | 10.52 | 6.42 | 3.89 | 2.93 | 1.93 | 1.02 |
| Zambia | 182.18 | 14.46 | 8.31 | 4.64 | 3.45 | 2.26 | 1.19 |
| Zimbabwe | 171.02 | 14.15 | 8.16 | 4.59 | 3.44 | 2.27 | 1.22 |

**Table S7. Age distribution of DALY rate for PCOS in women of reproductive age in different countries in 2019.**

| DALYs (Disability-Adjusted Life Years) | 15-19 years | 20-24 years | 25-29 years | 30-34 years | 35-39 years | 40-44 years | 45-49 years |
| --- | --- | --- | --- | --- | --- | --- | --- |
| Afghanistan | 19.29 | 23.49 | 22.60 | 21.44 | 20.43 | 19.50 | 16.40 |
| Albania | 2.64 | 3.44 | 3.42 | 3.30 | 3.28 | 3.18 | 2.61 |
| Algeria | 34.27 | 43.68 | 41.63 | 39.57 | 37.74 | 36.13 | 30.15 |
| American Samoa | 41.55 | 52.91 | 50.66 | 48.15 | 46.28 | 44.07 | 39.85 |
| Andorra | 47.30 | 68.12 | 68.99 | 65.17 | 61.71 | 58.94 | 51.86 |
| Angola | 8.86 | 11.57 | 11.49 | 11.11 | 10.85 | 10.59 | 9.40 |
| Antigua and Barbuda | 23.48 | 27.88 | 26.62 | 25.50 | 24.72 | 24.04 | 20.60 |
| Argentina | 21.38 | 34.61 | 33.66 | 31.92 | 30.24 | 28.93 | 23.74 |
| Armenia | 6.81 | 8.57 | 8.42 | 8.20 | 8.00 | 7.80 | 6.38 |
| Australia | 58.32 | 85.53 | 85.92 | 79.84 | 76.35 | 74.24 | 64.44 |
| Austria | 53.29 | 75.62 | 73.15 | 68.67 | 65.40 | 62.73 | 58.98 |
| Azerbaijan | 7.38 | 9.06 | 8.94 | 8.63 | 8.42 | 8.26 | 6.72 |
| Commonwealth of the Bahamas | 26.92 | 32.20 | 30.63 | 29.25 | 28.33 | 27.50 | 23.64 |
| Bahrain | 38.70 | 48.49 | 46.45 | 44.01 | 41.98 | 40.07 | 33.84 |
| Bangladesh | 8.11 | 10.29 | 10.25 | 10.22 | 10.15 | 9.71 | 7.70 |
| Barbados | 26.39 | 31.41 | 29.76 | 28.54 | 27.61 | 26.76 | 22.95 |
| Belarus | 3.57 | 4.56 | 4.60 | 4.58 | 4.53 | 4.47 | 3.66 |
| Belgium | 49.52 | 70.98 | 68.76 | 64.61 | 61.16 | 58.44 | 54.31 |
| Belize | 24.49 | 31.16 | 29.67 | 28.17 | 27.15 | 26.45 | 21.48 |
| Benin | 10.56 | 13.71 | 13.50 | 12.98 | 12.61 | 12.36 | 10.96 |
| Bermuda | 30.63 | 36.60 | 34.68 | 33.14 | 32.09 | 31.25 | 26.82 |
| Bhutan | 13.98 | 17.44 | 17.23 | 16.99 | 16.67 | 15.42 | 12.30 |
| Plurinational State of Bolivia | 40.47 | 52.28 | 51.83 | 50.00 | 47.90 | 46.62 | 38.80 |
| Bosnia and Herzegovina | 2.63 | 3.33 | 3.33 | 3.26 | 3.23 | 3.16 | 2.61 |
| Botswana | 14.09 | 18.61 | 18.00 | 17.42 | 16.86 | 16.27 | 13.97 |
| Brazil | 8.15 | 10.90 | 10.80 | 10.47 | 10.06 | 9.60 | 8.26 |
| Brunei Darussalam | 44.18 | 74.18 | 73.01 | 69.64 | 68.72 | 68.14 | 56.68 |
| Bulgaria | 3.03 | 3.84 | 3.81 | 3.71 | 3.64 | 3.58 | 2.97 |
| Burkina Faso | 8.47 | 11.12 | 11.01 | 10.61 | 10.32 | 10.19 | 8.92 |
| Burundi | 5.28 | 7.30 | 7.31 | 7.21 | 7.04 | 6.84 | 5.78 |
| Republic of Cabo Verde | 10.71 | 13.58 | 13.45 | 13.02 | 12.56 | 12.21 | 11.04 |
| Cambodia | 24.72 | 34.32 | 32.68 | 31.65 | 30.65 | 29.54 | 27.24 |
| Cameroon | 12.30 | 15.41 | 15.05 | 14.49 | 14.05 | 13.56 | 12.33 |
| Canada | 22.01 | 36.36 | 35.32 | 34.17 | 32.16 | 29.94 | 24.26 |
| Central African Republic | 6.77 | 8.96 | 8.96 | 8.77 | 8.60 | 8.31 | 7.68 |
| Chad | 5.78 | 7.73 | 7.81 | 7.68 | 7.57 | 7.42 | 6.79 |
| Chile | 25.74 | 41.82 | 40.63 | 38.67 | 36.53 | 35.01 | 28.76 |
| China | 20.02 | 25.82 | 25.82 | 25.81 | 25.25 | 24.10 | 22.24 |
| Colombia | 29.96 | 39.69 | 38.19 | 36.58 | 35.15 | 33.81 | 28.19 |
| Comoros | 10.14 | 12.98 | 12.72 | 12.36 | 12.05 | 11.59 | 10.61 |
| Congo | 9.50 | 12.51 | 12.40 | 12.03 | 11.76 | 11.40 | 10.07 |
| Cook Islands | 46.07 | 59.16 | 56.73 | 54.11 | 51.75 | 49.54 | 44.84 |
| Costa Rica | 38.89 | 49.97 | 47.82 | 45.65 | 44.04 | 42.31 | 36.46 |
| Croatia | 2.92 | 3.70 | 3.72 | 3.59 | 3.57 | 3.46 | 2.84 |
| Cuba | 25.44 | 30.35 | 28.91 | 27.67 | 26.79 | 26.04 | 22.01 |
| Cyprus | 42.91 | 62.77 | 63.17 | 59.66 | 56.53 | 53.83 | 47.67 |
| Czech Republic | 2.94 | 3.63 | 3.64 | 3.52 | 3.49 | 3.40 | 2.88 |
| Republic of C么te d'Ivoire | 9.59 | 12.25 | 12.11 | 11.79 | 11.45 | 11.12 | 10.13 |
| Democratic People's Republic of Korea | 12.28 | 15.56 | 15.18 | 14.74 | 14.46 | 14.13 | 13.04 |
| Democratic Republic of the Congo | 7.47 | 9.91 | 9.93 | 9.68 | 9.46 | 9.19 | 7.96 |
| Denmark | 42.70 | 59.59 | 62.73 | 60.38 | 57.97 | 55.74 | 45.47 |
| Djibouti | 11.29 | 14.11 | 13.94 | 13.57 | 13.25 | 12.84 | 12.00 |
| Dominica | 23.87 | 28.55 | 27.18 | 26.01 | 25.25 | 24.44 | 21.07 |
| Dominican Republic | 23.37 | 28.75 | 27.28 | 26.13 | 25.32 | 24.61 | 20.62 |
| Ecuador | 52.33 | 66.15 | 66.17 | 64.16 | 61.59 | 59.50 | 49.27 |
| Egypt | 38.70 | 47.41 | 43.60 | 41.27 | 40.30 | 39.05 | 31.52 |
| El Salvador | 31.70 | 42.12 | 41.13 | 39.26 | 37.66 | 36.32 | 30.14 |
| Equatorial Guinea | 14.69 | 18.51 | 18.18 | 17.44 | 16.95 | 16.43 | 14.71 |
| Eritrea | 6.95 | 9.11 | 9.10 | 8.94 | 8.70 | 8.46 | 7.82 |
| Estonia | 4.21 | 5.25 | 5.26 | 5.22 | 5.14 | 5.04 | 4.10 |
| Kingdom of Eswatini | 14.92 | 20.34 | 19.44 | 18.65 | 17.86 | 17.18 | 14.16 |
| Ethiopia | 6.45 | 8.97 | 9.37 | 9.31 | 9.17 | 8.90 | 8.02 |
| Fiji | 36.18 | 45.68 | 43.78 | 41.75 | 40.04 | 38.20 | 34.53 |
| Finland | 42.98 | 62.09 | 63.30 | 59.90 | 56.85 | 54.14 | 46.55 |
| France | 42.88 | 62.36 | 60.53 | 56.84 | 53.67 | 50.73 | 47.09 |
| Gabon | 12.70 | 15.96 | 15.71 | 15.19 | 14.74 | 14.27 | 12.92 |
| Republic of the Gambia | 8.69 | 11.24 | 11.09 | 10.69 | 10.42 | 10.14 | 9.00 |
| Georgia | 10.76 | 13.35 | 13.00 | 12.50 | 12.05 | 11.59 | 9.34 |
| Germany | 38.50 | 54.81 | 56.97 | 54.74 | 52.11 | 49.74 | 42.10 |
| Ghana | 8.87 | 11.55 | 11.42 | 11.11 | 10.76 | 10.52 | 9.40 |
| Greece | 47.97 | 68.98 | 70.05 | 66.23 | 62.86 | 59.95 | 52.61 |
| Greenland | 18.98 | 31.57 | 30.75 | 29.81 | 27.99 | 25.89 | 21.05 |
| Grenada | 21.08 | 25.09 | 23.98 | 22.97 | 22.20 | 21.61 | 18.60 |
| Guam | 47.57 | 61.11 | 58.39 | 55.68 | 53.52 | 51.02 | 46.32 |
| Guatemala | 27.17 | 34.77 | 33.51 | 32.25 | 31.10 | 29.93 | 26.22 |
| Guinea | 7.67 | 9.95 | 9.89 | 9.68 | 9.45 | 9.25 | 8.42 |
| Guinea-Bissau | 7.75 | 10.04 | 10.05 | 9.77 | 9.47 | 9.24 | 8.30 |
| Guyana | 22.20 | 25.79 | 24.62 | 23.55 | 22.87 | 22.13 | 19.45 |
| Haiti | 13.51 | 16.13 | 15.60 | 15.02 | 14.57 | 14.16 | 12.16 |
| Honduras | 27.94 | 35.97 | 34.54 | 33.19 | 32.08 | 30.96 | 26.67 |
| Hungary | 3.04 | 3.83 | 3.86 | 3.72 | 3.67 | 3.58 | 2.94 |
| Iceland | 49.09 | 70.52 | 71.72 | 67.61 | 64.43 | 61.28 | 54.33 |
| India | 16.51 | 21.64 | 22.57 | 22.66 | 22.06 | 20.98 | 16.79 |
| Indonesia | 37.52 | 51.31 | 49.18 | 47.57 | 46.11 | 44.24 | 41.51 |
| Islamic Republic of Iran | 34.03 | 43.83 | 42.45 | 40.75 | 38.83 | 36.69 | 29.60 |
| Iraq | 31.84 | 39.41 | 37.66 | 35.69 | 34.00 | 32.62 | 27.43 |
| Ireland | 45.28 | 65.56 | 66.41 | 62.59 | 59.44 | 56.57 | 49.99 |
| Israel | 40.30 | 57.77 | 59.07 | 56.22 | 53.43 | 51.14 | 44.55 |
| Italy | 110.70 | 145.74 | 149.21 | 141.48 | 134.50 | 128.44 | 105.65 |
| Jamaica | 23.28 | 27.18 | 25.99 | 24.81 | 24.12 | 23.33 | 20.47 |
| Japan | 71.30 | 120.78 | 120.91 | 115.46 | 113.27 | 111.62 | 92.91 |
| Jordan | 33.32 | 42.21 | 40.41 | 38.18 | 36.33 | 34.73 | 28.63 |
| Kazakhstan | 7.45 | 9.36 | 9.13 | 8.84 | 8.61 | 8.34 | 6.83 |
| Kenya | 7.99 | 11.06 | 11.54 | 11.51 | 11.28 | 10.87 | 9.66 |
| Kiribati | 29.27 | 36.48 | 35.13 | 33.65 | 32.30 | 30.80 | 27.67 |
| Kuwait | 44.27 | 55.55 | 52.98 | 50.15 | 47.86 | 45.87 | 38.67 |
| Kyrgyzstan | 5.45 | 6.83 | 6.83 | 6.66 | 6.50 | 6.34 | 5.31 |
| Lao People's Democratic Republic | 30.64 | 43.43 | 41.23 | 39.68 | 38.48 | 37.15 | 32.96 |
| Latvia | 3.72 | 4.73 | 4.74 | 4.70 | 4.64 | 4.59 | 3.78 |
| Lebanon | 37.18 | 45.34 | 43.29 | 41.07 | 39.34 | 37.69 | 32.60 |
| Lesotho | 12.74 | 16.07 | 15.45 | 14.91 | 14.53 | 14.00 | 12.07 |
| Liberia | 8.77 | 11.30 | 11.16 | 10.85 | 10.57 | 10.29 | 9.34 |
| Libya | 35.34 | 44.90 | 42.98 | 40.75 | 38.79 | 37.22 | 30.77 |
| Lithuania | 3.55 | 4.44 | 4.54 | 4.52 | 4.46 | 4.40 | 3.65 |
| Luxembourg | 47.96 | 69.22 | 70.06 | 66.08 | 62.79 | 59.93 | 51.89 |
| Madagascar | 6.65 | 8.78 | 8.77 | 8.60 | 8.39 | 8.17 | 7.16 |
| Malawi | 9.17 | 11.86 | 11.75 | 11.49 | 11.15 | 10.86 | 9.55 |
| Malaysia | 56.56 | 78.17 | 75.35 | 72.42 | 70.13 | 67.65 | 60.20 |
| Maldives | 45.85 | 61.34 | 57.98 | 55.90 | 54.19 | 52.39 | 48.97 |
| Mali | 6.89 | 9.05 | 9.00 | 8.80 | 8.57 | 8.40 | 7.56 |
| Malta | 47.17 | 68.24 | 69.19 | 65.29 | 61.91 | 58.94 | 51.83 |
| Marshall Islands | 28.06 | 35.04 | 33.62 | 32.22 | 30.90 | 29.43 | 26.53 |
| Mauritania | 11.08 | 14.00 | 13.68 | 13.23 | 12.82 | 12.43 | 11.14 |
| Mauritius | 51.01 | 71.72 | 68.83 | 65.98 | 63.91 | 61.63 | 53.84 |
| Mexico | 49.92 | 64.12 | 62.22 | 59.61 | 57.19 | 54.88 | 47.97 |
| Federated States of Micronesia | 31.68 | 39.70 | 38.11 | 36.40 | 34.91 | 33.34 | 30.24 |
| Principality of Monaco | 48.13 | 69.27 | 70.28 | 66.39 | 63.13 | 60.24 | 52.97 |
| Mongolia | 6.34 | 7.95 | 7.86 | 7.62 | 7.42 | 7.31 | 5.98 |
| Montenegro | 3.03 | 3.84 | 3.84 | 3.72 | 3.65 | 3.59 | 2.95 |
| Morocco | 33.06 | 40.14 | 38.29 | 36.33 | 34.69 | 33.21 | 27.82 |
| Mozambique | 8.81 | 11.24 | 11.15 | 10.94 | 10.64 | 10.26 | 9.45 |
| Myanmar | 32.14 | 45.41 | 43.02 | 41.48 | 40.16 | 38.73 | 34.45 |
| Namibia | 11.35 | 15.40 | 14.89 | 14.42 | 13.90 | 13.42 | 11.18 |
| Republic of Nauru | 36.81 | 46.66 | 44.82 | 42.73 | 41.00 | 39.13 | 35.40 |
| Nepal | 9.11 | 11.44 | 11.40 | 11.27 | 11.27 | 10.52 | 8.28 |
| Netherlands | 40.11 | 59.11 | 59.37 | 55.89 | 52.95 | 50.46 | 44.86 |
| New Zealand | 69.27 | 102.72 | 103.90 | 96.88 | 92.09 | 88.62 | 75.05 |
| Nicaragua | 29.56 | 39.29 | 37.97 | 36.43 | 34.92 | 33.61 | 27.89 |
| Niger | 5.93 | 7.90 | 7.95 | 7.73 | 7.53 | 7.45 | 6.62 |
| Nigeria | 8.31 | 11.37 | 11.74 | 11.62 | 11.41 | 11.10 | 10.21 |
| Republic of Niue | 42.75 | 54.69 | 52.32 | 50.08 | 47.87 | 45.60 | 41.25 |
| North Macedonia | 2.67 | 3.40 | 3.42 | 3.33 | 3.26 | 3.24 | 2.69 |
| Northern Mariana Islands | 40.88 | 52.04 | 49.86 | 47.64 | 45.76 | 43.56 | 39.51 |
| Norway | 45.34 | 69.34 | 68.05 | 64.13 | 60.68 | 57.99 | 48.45 |
| Oman | 38.48 | 48.24 | 46.02 | 43.70 | 41.65 | 39.76 | 33.57 |
| Pakistan | 8.67 | 13.11 | 13.42 | 13.25 | 12.65 | 11.35 | 9.64 |
| Republic of Palau | 42.78 | 54.63 | 52.47 | 49.96 | 47.90 | 45.60 | 41.22 |
| Palestine | 30.18 | 37.26 | 35.55 | 33.80 | 32.25 | 30.78 | 25.91 |
| Panama | 31.84 | 39.94 | 38.46 | 36.88 | 35.74 | 34.45 | 30.45 |
| Papua New Guinea | 23.09 | 28.72 | 27.62 | 26.51 | 25.49 | 24.37 | 21.33 |
| Paraguay | 8.21 | 10.41 | 10.32 | 10.06 | 9.75 | 9.40 | 8.52 |
| Peru | 43.39 | 54.39 | 58.08 | 56.74 | 51.37 | 49.05 | 41.02 |
| Philippines | 34.56 | 49.25 | 47.89 | 46.66 | 45.44 | 43.81 | 37.11 |
| Poland | 4.00 | 4.65 | 4.60 | 4.44 | 4.33 | 4.24 | 3.59 |
| Portugal | 41.94 | 61.10 | 61.85 | 58.71 | 55.57 | 52.79 | 47.12 |
| Puerto Rico | 35.05 | 42.48 | 40.27 | 38.34 | 37.07 | 35.90 | 30.68 |
| Qatar | 42.83 | 54.02 | 51.39 | 48.68 | 46.49 | 44.42 | 37.37 |
| Republic of Korea | 36.17 | 61.26 | 60.36 | 57.19 | 56.24 | 55.79 | 46.29 |
| Republic of Moldova | 3.21 | 4.16 | 4.17 | 4.19 | 4.15 | 4.10 | 3.38 |
| Romania | 2.87 | 3.62 | 3.60 | 3.54 | 3.50 | 3.44 | 2.85 |
| Russian Federation | 3.25 | 4.44 | 4.67 | 4.76 | 4.77 | 4.75 | 3.97 |
| Rwanda | 8.40 | 11.85 | 11.70 | 11.23 | 10.86 | 10.61 | 8.83 |
| Saint Kitts and Nevis | 27.43 | 32.67 | 31.09 | 29.68 | 28.70 | 27.84 | 23.86 |
| Saint Lucia | 22.11 | 26.33 | 25.08 | 24.05 | 23.20 | 22.51 | 19.21 |
| Saint Vincent and the Grenadines | 22.66 | 27.01 | 25.73 | 24.62 | 23.86 | 23.13 | 19.79 |
| Samoa | 35.75 | 45.02 | 43.41 | 41.32 | 39.72 | 37.85 | 34.18 |
| Republic of San Marino | 46.22 | 66.88 | 67.70 | 63.92 | 60.47 | 57.75 | 50.87 |
| Sao Tome and Principe | 8.97 | 12.06 | 11.78 | 11.34 | 11.01 | 10.97 | 9.46 |
| Saudi Arabia | 41.99 | 53.06 | 50.54 | 47.79 | 45.69 | 43.65 | 36.63 |
| Senegal | 8.57 | 11.09 | 11.02 | 10.65 | 10.39 | 10.07 | 9.13 |
| Serbia | 2.69 | 3.41 | 3.43 | 3.35 | 3.32 | 3.25 | 2.65 |
| Seychelles | 47.35 | 66.90 | 63.97 | 61.51 | 59.62 | 57.48 | 50.38 |
| Sierra Leone | 8.68 | 11.27 | 11.21 | 10.90 | 10.64 | 10.39 | 9.37 |
| Singapore | 43.02 | 72.25 | 71.00 | 67.58 | 66.91 | 66.51 | 55.42 |
| Slovakia | 2.91 | 3.68 | 3.68 | 3.54 | 3.49 | 3.44 | 2.86 |
| Slovenia | 3.04 | 3.91 | 3.92 | 3.80 | 3.76 | 3.62 | 3.01 |
| Solomon Islands | 25.81 | 31.94 | 30.86 | 29.58 | 28.39 | 27.08 | 24.29 |
| Somalia | 6.61 | 8.68 | 8.74 | 8.52 | 8.39 | 8.12 | 7.16 |
| South Africa | 16.17 | 21.00 | 20.39 | 19.74 | 19.13 | 18.47 | 16.17 |
| South Sudan | 6.99 | 9.20 | 9.20 | 9.01 | 8.82 | 8.55 | 7.55 |
| Spain | 43.28 | 60.35 | 62.47 | 59.82 | 57.27 | 55.10 | 47.19 |
| Sri Lanka | 42.36 | 60.48 | 57.91 | 55.74 | 53.87 | 51.82 | 44.92 |
| Sudan | 28.28 | 33.35 | 32.13 | 30.69 | 29.58 | 28.35 | 25.20 |
| Suriname | 23.80 | 28.39 | 26.98 | 25.84 | 24.95 | 24.21 | 20.70 |
| Sweden | 32.33 | 49.03 | 47.83 | 45.44 | 42.89 | 40.75 | 36.26 |
| Switzerland | 40.15 | 58.94 | 59.29 | 55.97 | 53.09 | 50.67 | 43.99 |
| Syrian Arab Republic | 31.30 | 39.59 | 37.85 | 35.98 | 34.40 | 33.03 | 27.78 |
| Taiwan (Province of China) | 35.67 | 46.49 | 44.45 | 42.95 | 41.86 | 40.42 | 36.87 |
| Tajikistan | 4.58 | 5.89 | 5.91 | 5.79 | 5.65 | 5.51 | 4.52 |
| Thailand | 48.40 | 68.74 | 65.49 | 62.83 | 60.75 | 58.60 | 50.08 |
| Timor-Leste | 25.83 | 36.69 | 35.08 | 33.72 | 32.63 | 31.26 | 27.77 |
| Togo | 8.14 | 10.70 | 10.61 | 10.25 | 9.94 | 9.73 | 8.62 |
| Tokelau | 38.00 | 48.32 | 46.51 | 44.29 | 42.67 | 40.62 | 36.62 |
| Tonga | 41.84 | 53.41 | 51.19 | 48.77 | 46.84 | 44.74 | 40.38 |
| Trinidad and Tobago | 26.48 | 31.00 | 29.44 | 27.97 | 27.15 | 26.29 | 22.84 |
| Tunisia | 33.56 | 41.67 | 39.84 | 37.73 | 35.95 | 34.39 | 28.75 |
| Turkey | 31.89 | 39.59 | 37.63 | 35.76 | 34.24 | 32.86 | 27.59 |
| Turkmenistan | 7.03 | 8.79 | 8.61 | 8.38 | 8.17 | 7.95 | 6.56 |
| Tuvalu | 34.03 | 43.08 | 41.25 | 39.51 | 37.91 | 36.26 | 32.73 |
| Uganda | 8.38 | 10.98 | 10.86 | 10.51 | 10.27 | 9.92 | 8.65 |
| Ukraine | 2.77 | 3.87 | 4.12 | 4.17 | 4.25 | 4.21 | 3.47 |
| United Arab Emirates | 39.31 | 49.19 | 46.84 | 44.42 | 42.41 | 40.65 | 34.33 |
| United Kingdom of Great Britain and Northern Ireland | 49.37 | 73.75 | 72.91 | 68.64 | 64.66 | 61.58 | 51.11 |
| United Republic of Tanzania | 9.70 | 12.38 | 12.19 | 11.88 | 11.64 | 11.22 | 10.19 |
| United States of America | 37.59 | 65.41 | 63.31 | 60.95 | 57.81 | 53.75 | 43.14 |
| United States Virgin Islands | 33.67 | 40.47 | 38.35 | 36.66 | 35.39 | 34.33 | 29.43 |
| Uruguay | 23.32 | 38.04 | 37.11 | 35.20 | 33.33 | 31.87 | 26.02 |
| Uzbekistan | 6.82 | 8.69 | 8.59 | 8.29 | 8.09 | 7.88 | 6.43 |
| Vanuatu | 28.25 | 35.23 | 33.79 | 32.40 | 31.19 | 29.77 | 26.82 |
| Bolivarian Republic of Venezuela | 35.48 | 46.04 | 44.23 | 42.34 | 40.76 | 39.26 | 33.54 |
| Socialist Republic of Viet Nam | 27.82 | 40.36 | 39.36 | 38.03 | 36.80 | 35.59 | 29.83 |
| Yemen | 19.67 | 23.56 | 22.59 | 21.55 | 20.66 | 19.79 | 17.11 |
| Zambia | 11.06 | 14.11 | 13.88 | 13.58 | 13.29 | 13.04 | 11.54 |
| Zimbabwe | 10.22 | 13.71 | 13.39 | 12.95 | 12.61 | 12.21 | 10.41 |

**Table S8. Numbers of DALY and Incidence for PCOS in women of reproductive age in 1990 and 2019 by countries**

| Country | Region | Numbers of DALY in 1990 | Numbers of DALY in 2019 | Numbers of Incidencein 1990 | Numbers of Incidencein 2019 | time_DALY | time_incidence |
| --- | --- | --- | --- | --- | --- | --- | --- |
| Afghanistan | North Africa and Middle East | 346.15 | 1835.70 | 1319.70 | 5643.05 | 5.30 | 4.28 |
| Albania | Central Europe | 19.18 | 19.98 | 57.59 | 45.65 | 1.04 | 0.79 |
| Algeria | North Africa and Middle East | 1494.88 | 4237.79 | 4291.27 | 6634.57 | 2.83 | 1.55 |
| American Samoa | Oceania | 4.00 | 6.34 | 9.75 | 15.83 | 1.59 | 1.62 |
| Andorra | Western Europe | 7.20 | 11.90 | 10.76 | 14.77 | 1.65 | 1.37 |
| Angola | Central sub-Saharan Africa | 128.02 | 747.74 | 528.41 | 2669.56 | 5.84 | 5.05 |
| Antigua and Barbuda | Caribbean | 2.94 | 6.05 | 6.50 | 10.00 | 2.05 | 1.54 |
| Argentina | Southern Latin America | 1450.49 | 3446.60 | 4565.41 | 9166.28 | 2.38 | 2.01 |
| Armenia | Central Asia | 41.45 | 58.79 | 112.62 | 101.37 | 1.42 | 0.90 |
| Australia | Australasia | 2733.44 | 4367.91 | 7560.38 | 9496.37 | 1.60 | 1.26 |
| Austria | Western Europe | 1215.27 | 1299.65 | 1780.20 | 1654.70 | 1.07 | 0.93 |
| Azerbaijan | Central Asia | 92.49 | 228.99 | 274.09 | 416.24 | 2.48 | 1.52 |
| Commonwealth of the Bahamas | North Africa and Middle East | 17.26 | 29.83 | 37.56 | 51.17 | 1.73 | 1.36 |
| Bahrain | South Asia | 43.06 | 137.92 | 78.74 | 200.06 | 3.20 | 2.54 |
| Bangladesh | Caribbean | 1374.46 | 4286.81 | 5575.43 | 12230.59 | 3.12 | 2.19 |
| Barbados | Eastern Europe | 15.95 | 19.70 | 30.95 | 31.72 | 1.23 | 1.02 |
| Belarus | Western Europe | 75.78 | 93.91 | 215.95 | 184.95 | 1.24 | 0.86 |
| Belgium | Caribbean | 1232.68 | 1521.14 | 1923.18 | 2219.60 | 1.23 | 1.15 |
| Belize | Western sub-Saharan Africa | 7.70 | 31.16 | 23.08 | 70.81 | 4.05 | 3.07 |
| Benin | Caribbean | 70.02 | 376.17 | 271.67 | 1341.22 | 5.37 | 4.94 |
| Bermuda | South Asia | 5.00 | 4.44 | 6.65 | 5.64 | 0.89 | 0.85 |
| Bhutan | Andean Latin America | 11.46 | 32.74 | 43.71 | 79.21 | 2.86 | 1.81 |
| Plurinational State of Bolivia | Central Europe | 511.87 | 1441.60 | 1252.94 | 2645.56 | 2.82 | 2.11 |
| Bosnia and Herzegovina | Southern sub-Saharan Africa | 22.09 | 23.17 | 61.24 | 46.53 | 1.05 | 0.76 |
| Botswana | Tropical Latin America | 32.61 | 110.79 | 128.56 | 276.05 | 3.40 | 2.15 |
| Brazil | High-income Asia Pacific | 3434.82 | 5737.73 | 10675.59 | 12465.34 | 1.67 | 1.17 |
| Brunei Darussalam | Central Europe | 26.91 | 81.26 | 101.67 | 245.94 | 3.02 | 2.42 |
| Bulgaria | Western sub-Saharan Africa | 56.14 | 51.43 | 128.59 | 87.58 | 0.92 | 0.68 |
| Burkina Faso | Eastern Sub-Saharan Africa | 128.85 | 547.54 | 524.60 | 1997.33 | 4.25 | 3.81 |
| Burundi | Southeast Asia | 77.18 | 185.32 | 304.54 | 766.13 | 2.40 | 2.52 |
| Republic of Cabo Verde | Western sub-Saharan Africa | 5.65 | 18.43 | 23.13 | 49.66 | 3.26 | 2.15 |
| Cambodia | High-income North America | 416.38 | 1337.57 | 1407.14 | 3117.72 | 3.21 | 2.22 |
| Cameroon | Western sub-Saharan Africa | 241.38 | 1023.84 | 880.84 | 3430.24 | 4.24 | 3.89 |
| Canada | Central sub-Saharan Africa | 1751.29 | 2490.72 | 4049.92 | 5594.88 | 1.42 | 1.38 |
| Central African Republic | Western sub-Saharan Africa | 49.32 | 109.12 | 181.54 | 411.90 | 2.21 | 2.27 |
| Chad | Southern Latin America | 60.17 | 255.03 | 267.07 | 1116.04 | 4.24 | 4.18 |
| Chile | East Asia | 701.66 | 1637.92 | 2191.70 | 3760.93 | 2.33 | 1.72 |
| China | Central Latin America | 39363.84 | 85343.89 | 124043.31 | 129139.38 | 2.17 | 1.04 |
| Colombia | Eastern Sub-Saharan Africa | 2214.92 | 4387.76 | 4767.89 | 7055.69 | 1.98 | 1.48 |
| Comoros | Central sub-Saharan Africa | 10.28 | 21.85 | 39.64 | 66.08 | 2.13 | 1.67 |
| Congo | Central Latin America | 45.27 | 155.06 | 189.56 | 486.08 | 3.43 | 2.56 |
| Cook Islands | Western sub-Saharan Africa | 1.57 | 2.24 | 4.08 | 4.14 | 1.43 | 1.02 |
| Costa Rica | Central Europe | 249.97 | 567.78 | 476.60 | 786.75 | 2.27 | 1.65 |
| Croatia | Caribbean | 29.40 | 31.17 | 66.05 | 57.76 | 1.06 | 0.87 |
| Cuba | Western Europe | 608.87 | 690.44 | 1367.43 | 1057.50 | 1.13 | 0.77 |
| Cyprus | Central Europe | 72.63 | 194.82 | 134.12 | 218.09 | 2.68 | 1.63 |
| Czech Republic | Central sub-Saharan Africa | 64.62 | 78.27 | 157.85 | 129.12 | 1.21 | 0.82 |
| Republic of C么te d'Ivoire | Western Europe | 177.77 | 715.78 | 723.09 | 2334.48 | 4.03 | 3.23 |
| Democratic People's Republic of Korea | Eastern Sub-Saharan Africa | 724.10 | 941.44 | 2005.67 | 1965.20 | 1.30 | 0.98 |
| Democratic Republic of the Congo | Caribbean | 511.44 | 1873.29 | 2126.46 | 7192.06 | 3.66 | 3.38 |
| Denmark | Caribbean | 544.76 | 693.42 | 953.78 | 1148.99 | 1.27 | 1.20 |
| Djibouti | Andean Latin America | 7.66 | 40.25 | 30.46 | 96.83 | 5.25 | 3.18 |
| Dominica | North Africa and Middle East | 3.07 | 4.19 | 8.45 | 8.32 | 1.37 | 0.98 |
| Dominican Republic | Central Latin America | 295.28 | 725.88 | 838.11 | 1456.14 | 2.46 | 1.74 |
| Ecuador | Central sub-Saharan Africa | 1132.05 | 2787.11 | 2583.65 | 4922.93 | 2.46 | 1.91 |
| Egypt | Eastern Sub-Saharan Africa | 4246.63 | 10245.76 | 10118.22 | 20364.56 | 2.41 | 2.01 |
| El Salvador | Eastern Europe | 330.55 | 656.43 | 824.32 | 1122.95 | 1.99 | 1.36 |
| Equatorial Guinea | Eastern Sub-Saharan Africa | 6.34 | 56.74 | 25.09 | 186.49 | 8.94 | 7.43 |
| Eritrea | Oceania | 36.27 | 142.28 | 151.51 | 528.35 | 3.92 | 3.49 |
| Estonia | Oceania | 12.23 | 13.88 | 32.74 | 27.30 | 1.14 | 0.83 |
| Kingdom of Eswatini | Western Europe | 27.09 | 55.52 | 98.90 | 159.52 | 2.05 | 1.61 |
| Ethiopia | Western Europe | 606.23 | 2233.19 | 2783.47 | 9506.16 | 3.68 | 3.42 |
| Fiji | Central sub-Saharan Africa | 49.53 | 91.67 | 126.64 | 179.19 | 1.85 | 1.41 |
| Finland | Central Asia | 536.91 | 629.40 | 796.39 | 974.96 | 1.17 | 1.22 |
| France | Western Europe | 6022.00 | 7590.26 | 10709.71 | 12689.49 | 1.26 | 1.18 |
| Gabon | Western sub-Saharan Africa | 20.30 | 70.68 | 78.93 | 208.37 | 3.48 | 2.64 |
| Republic of the Gambia | Western Europe | 14.97 | 59.05 | 60.80 | 219.60 | 3.95 | 3.61 |
| Georgia | High-income North America | 85.30 | 96.74 | 202.72 | 157.92 | 1.13 | 0.78 |
| Germany | Caribbean | 7816.44 | 8665.76 | 11015.46 | 12435.40 | 1.11 | 1.13 |
| Ghana | Oceania | 238.71 | 916.87 | 935.81 | 2869.11 | 3.84 | 3.07 |
| Greece | Central Latin America | 1204.80 | 1361.46 | 2179.09 | 1838.16 | 1.13 | 0.84 |
| Greenland | Western sub-Saharan Africa | 2.94 | 3.45 | 6.38 | 8.95 | 1.17 | 1.40 |
| Grenada | Western sub-Saharan Africa | 2.93 | 5.84 | 8.41 | 11.25 | 1.99 | 1.34 |
| Guam | Caribbean | 12.89 | 20.71 | 26.27 | 37.76 | 1.61 | 1.44 |
| Guatemala | Caribbean | 375.35 | 1545.99 | 989.13 | 3107.22 | 4.12 | 3.14 |
| Guinea | Central Latin America | 82.71 | 284.97 | 312.52 | 1048.97 | 3.45 | 3.36 |
| Guinea-Bissau | Central Europe | 13.93 | 46.08 | 57.83 | 161.73 | 3.31 | 2.80 |
| Guyana | Western Europe | 31.95 | 48.65 | 89.68 | 100.68 | 1.52 | 1.12 |
| Haiti | South Asia | 172.94 | 502.83 | 512.24 | 1210.78 | 2.91 | 2.36 |
| Honduras | Southeast Asia | 212.16 | 868.27 | 580.38 | 1803.67 | 4.09 | 3.11 |
| Hungary | North Africa and Middle East | 69.40 | 76.89 | 158.46 | 133.33 | 1.11 | 0.84 |
| Iceland | North Africa and Middle East | 32.42 | 49.91 | 60.00 | 79.54 | 1.54 | 1.33 |
| India | Western Europe | 21497.23 | 75653.35 | 64809.88 | 179301.96 | 3.52 | 2.77 |
| Indonesia | Western Europe | 10879.06 | 31991.97 | 36098.74 | 70897.21 | 2.94 | 1.96 |
| Islamic Republic of Iran | Western Europe | 3668.66 | 8929.67 | 10730.17 | 13015.98 | 2.43 | 1.21 |
| Iraq | Caribbean | 1166.29 | 3896.56 | 3427.44 | 8656.81 | 3.34 | 2.53 |
| Ireland | High-income Asia Pacific | 400.77 | 680.21 | 916.72 | 1095.08 | 1.70 | 1.19 |
| Israel | North Africa and Middle East | 478.71 | 1121.81 | 1118.46 | 2274.39 | 2.34 | 2.03 |
| Italy | Central Asia | 19310.05 | 16198.17 | 29025.18 | 17483.60 | 0.84 | 0.60 |
| Jamaica | Eastern Sub-Saharan Africa | 104.28 | 188.95 | 279.44 | 351.52 | 1.81 | 1.26 |
| Japan | Oceania | 31719.63 | 27022.66 | 107620.74 | 71883.31 | 0.85 | 0.67 |
| Jordan | North Africa and Middle East | 236.66 | 1054.85 | 738.10 | 2358.88 | 4.46 | 3.20 |
| Kazakhstan | Central Asia | 228.49 | 396.11 | 619.84 | 766.29 | 1.73 | 1.24 |
| Kenya | Southeast Asia | 425.62 | 1372.93 | 2023.20 | 5297.74 | 3.23 | 2.62 |
| Kiribati | Eastern Europe | 3.96 | 10.14 | 10.25 | 22.74 | 2.56 | 2.22 |
| Kuwait | North Africa and Middle East | 172.85 | 661.37 | 305.07 | 617.32 | 3.83 | 2.02 |
| Kyrgyzstan | Southern sub-Saharan Africa | 52.15 | 106.52 | 169.75 | 266.77 | 2.04 | 1.57 |
| Lao People's Democratic Republic | Western sub-Saharan Africa | 186.96 | 734.54 | 669.71 | 1787.84 | 3.93 | 2.67 |
| Latvia | North Africa and Middle East | 20.72 | 17.96 | 55.39 | 36.85 | 0.87 | 0.67 |
| Lebanon | Eastern Europe | 230.89 | 537.13 | 547.42 | 744.50 | 2.33 | 1.36 |
| Lesotho | Western Europe | 38.73 | 81.36 | 148.76 | 242.54 | 2.10 | 1.63 |
| Liberia | Central Europe | 29.45 | 128.61 | 122.41 | 452.23 | 4.37 | 3.69 |
| Libya | Eastern Sub-Saharan Africa | 309.03 | 767.93 | 926.25 | 1293.64 | 2.49 | 1.40 |
| Lithuania | Eastern Sub-Saharan Africa | 26.58 | 25.49 | 77.40 | 55.79 | 0.96 | 0.72 |
| Luxembourg | Southeast Asia | 45.76 | 92.70 | 60.38 | 121.20 | 2.03 | 2.01 |
| Madagascar | Southeast Asia | 181.95 | 536.09 | 753.04 | 1996.58 | 2.95 | 2.65 |
| Malawi | Western sub-Saharan Africa | 208.26 | 503.04 | 798.26 | 2019.85 | 2.42 | 2.53 |
| Malaysia | Western Europe | 1699.33 | 5751.33 | 4768.29 | 10838.33 | 3.38 | 2.27 |
| Maldives | Oceania | 10.02 | 61.70 | 37.82 | 95.35 | 6.16 | 2.52 |
| Mali | Western sub-Saharan Africa | 95.50 | 414.71 | 387.53 | 1712.00 | 4.34 | 4.42 |
| Malta | Southeast Asia | 40.91 | 58.16 | 70.25 | 74.04 | 1.42 | 1.05 |
| Marshall Islands | Central Latin America | 1.75 | 4.57 | 5.90 | 10.62 | 2.61 | 1.80 |
| Mauritania | Eastern Europe | 40.91 | 128.08 | 154.51 | 447.89 | 3.13 | 2.90 |
| Mauritius | Central Asia | 114.39 | 201.50 | 269.55 | 350.52 | 1.76 | 1.30 |
| Mexico | Central Europe | 12124.88 | 19292.67 | 27607.14 | 30443.40 | 1.59 | 1.10 |
| Federated States of Micronesia | North Africa and Middle East | 5.51 | 9.15 | 17.79 | 23.22 | 1.66 | 1.31 |
| Principality of Monaco | Eastern Sub-Saharan Africa | 3.57 | 4.41 | 3.93 | 6.53 | 1.23 | 1.66 |
| Mongolia | Southeast Asia | 24.26 | 66.04 | 87.25 | 128.31 | 2.72 | 1.47 |
| Montenegro | Southern sub-Saharan Africa | 4.15 | 5.14 | 10.46 | 10.67 | 1.24 | 1.02 |
| Morocco | South Asia | 1640.38 | 3367.98 | 4273.02 | 6269.56 | 2.05 | 1.47 |
| Mozambique | Western Europe | 201.05 | 733.58 | 809.13 | 2862.17 | 3.65 | 3.54 |
| Myanmar | Australasia | 1821.15 | 5910.43 | 6087.79 | 13071.36 | 3.25 | 2.15 |
| Namibia | Central Latin America | 33.04 | 87.79 | 129.08 | 263.60 | 2.66 | 2.04 |
| Republic of Nauru | Western sub-Saharan Africa | 0.68 | 1.15 | 1.76 | 2.68 | 1.69 | 1.52 |
| Nepal | Western sub-Saharan Africa | 255.86 | 931.00 | 951.29 | 2721.47 | 3.64 | 2.86 |
| Netherlands | East Asia | 1624.96 | 1925.53 | 2699.90 | 3232.32 | 1.18 | 1.20 |
| New Zealand | Oceania | 800.33 | 912.81 | 2158.26 | 2183.58 | 1.14 | 1.01 |
| Nicaragua | Western Europe | 209.87 | 612.89 | 554.00 | 1112.18 | 2.92 | 2.01 |
| Niger | North Africa and Middle East | 93.17 | 351.61 | 393.81 | 1585.40 | 3.77 | 4.03 |
| Nigeria | South Asia | 1483.55 | 5679.77 | 6897.07 | 23043.69 | 3.83 | 3.34 |
| Republic of Niue | North Africa and Middle East | 0.15 | 0.18 | 0.37 | 0.34 | 1.19 | 0.91 |
| North Macedonia | Central Latin America | 11.19 | 16.50 | 29.86 | 31.51 | 1.48 | 1.06 |
| Northern Mariana Islands | Oceania | 4.90 | 4.36 | 9.62 | 10.84 | 0.89 | 1.13 |
| Norway | Tropical Latin America | 594.25 | 716.54 | 1074.31 | 1201.42 | 1.21 | 1.12 |
| Oman | Andean Latin America | 82.72 | 409.38 | 219.22 | 607.14 | 4.95 | 2.77 |
| Pakistan | Southeast Asia | 2379.76 | 6457.68 | 9660.99 | 23659.06 | 2.71 | 2.45 |
| Republic of Palau | Central Europe | 1.34 | 1.84 | 3.16 | 3.06 | 1.37 | 0.97 |
| Palestine | Western Europe | 112.74 | 410.19 | 341.09 | 978.64 | 3.64 | 2.87 |
| Panama | Caribbean | 129.92 | 370.07 | 301.18 | 634.90 | 2.85 | 2.11 |
| Papua New Guinea | North Africa and Middle East | 161.89 | 639.43 | 494.90 | 1529.54 | 3.95 | 3.09 |
| Paraguay | Central Europe | 54.22 | 175.13 | 177.82 | 437.93 | 3.23 | 2.46 |
| Peru | Eastern Europe | 1884.35 | 4547.37 | 4689.32 | 7225.06 | 2.41 | 1.54 |
| Philippines | Eastern Sub-Saharan Africa | 3808.75 | 12475.76 | 13593.36 | 32415.06 | 3.28 | 2.38 |
| Poland | Caribbean | 380.06 | 382.70 | 950.76 | 539.41 | 1.01 | 0.57 |
| Portugal | Caribbean | 977.37 | 1282.75 | 2033.81 | 1860.77 | 1.31 | 0.91 |
| Puerto Rico | Oceania | 272.76 | 301.73 | 529.98 | 457.43 | 1.11 | 0.86 |
| Qatar | Central sub-Saharan Africa | 31.71 | 217.30 | 55.68 | 224.95 | 6.85 | 4.04 |
| Republic of Korea | North Africa and Middle East | 4142.33 | 6631.50 | 15691.30 | 15040.89 | 1.60 | 0.96 |
| Republic of Moldova | Western sub-Saharan Africa | 28.06 | 35.78 | 86.10 | 75.64 | 1.28 | 0.88 |
| Romania | Central Europe | 127.58 | 140.83 | 344.32 | 266.75 | 1.10 | 0.77 |
| Russian Federation | Southeast Asia | 1172.45 | 1529.08 | 3764.13 | 3637.99 | 1.30 | 0.97 |
| Rwanda | Western sub-Saharan Africa | 131.01 | 348.81 | 530.07 | 1240.75 | 2.66 | 2.34 |
| Saint Kitts and Nevis | High-income Asia Pacific | 2.09 | 4.49 | 5.33 | 7.44 | 2.15 | 1.40 |
| Saint Lucia | Central Europe | 5.80 | 10.87 | 16.42 | 18.84 | 1.87 | 1.15 |
| Saint Vincent and the Grenadines | Central Europe | 4.01 | 6.73 | 12.06 | 12.86 | 1.68 | 1.07 |
| Samoa | Oceania | 10.64 | 20.05 | 34.01 | 53.68 | 1.88 | 1.58 |
| Republic of San Marino | Eastern Sub-Saharan Africa | 2.90 | 4.70 | 5.54 | 7.28 | 1.62 | 1.32 |
| Sao Tome and Principe | Southern sub-Saharan Africa | 1.80 | 5.73 | 8.08 | 20.35 | 3.19 | 2.52 |
| Saudi Arabia | High-income Asia Pacific | 1058.13 | 4541.47 | 2856.42 | 5979.72 | 4.29 | 2.09 |
| Senegal | Eastern Sub-Saharan Africa | 134.71 | 377.00 | 544.55 | 1328.30 | 2.80 | 2.44 |
| Serbia | Western Europe | 51.34 | 62.03 | 128.08 | 129.60 | 1.21 | 1.01 |
| Seychelles | Southeast Asia | 7.36 | 14.17 | 21.27 | 24.51 | 1.92 | 1.15 |
| Sierra Leone | North Africa and Middle East | 49.86 | 220.47 | 194.12 | 806.29 | 4.42 | 4.15 |
| Singapore | Caribbean | 352.20 | 959.30 | 1020.02 | 1662.35 | 2.72 | 1.63 |
| Slovakia | Southern sub-Saharan Africa | 31.18 | 43.52 | 78.89 | 73.12 | 1.40 | 0.93 |
| Slovenia | Western Europe | 12.35 | 15.39 | 28.80 | 26.17 | 1.25 | 0.91 |
| Solomon Islands | Western Europe | 13.08 | 46.72 | 46.35 | 118.86 | 3.57 | 2.56 |
| Somalia | North Africa and Middle East | 102.07 | 364.98 | 416.91 | 1486.37 | 3.58 | 3.57 |
| South Africa | East Asia | 1374.59 | 2863.46 | 4785.05 | 6961.36 | 2.08 | 1.45 |
| South Sudan | Central Asia | 96.16 | 184.57 | 403.82 | 753.29 | 1.92 | 1.87 |
| Spain | Eastern Sub-Saharan Africa | 4021.39 | 5599.42 | 8648.59 | 7607.31 | 1.39 | 0.88 |
| Sri Lanka | Southeast Asia | 1387.40 | 2931.82 | 3749.18 | 5772.81 | 2.11 | 1.54 |
| Sudan | Caribbean | 743.45 | 3186.87 | 2316.71 | 7898.96 | 4.29 | 3.41 |
| Suriname | Western sub-Saharan Africa | 17.28 | 36.46 | 43.18 | 68.73 | 2.11 | 1.59 |
| Sweden | Southeast Asia | 702.80 | 920.13 | 1294.74 | 1560.38 | 1.31 | 1.21 |
| Switzerland | Western sub-Saharan Africa | 795.95 | 1016.78 | 1122.91 | 1340.97 | 1.28 | 1.19 |
| Syrian Arab Republic | Oceania | 707.55 | 1362.74 | 2220.07 | 3709.57 | 1.93 | 1.67 |
| Taiwan (Province of China) | Caribbean | 1345.62 | 2386.45 | 2877.70 | 2992.98 | 1.77 | 1.04 |
| Tajikistan | North Africa and Middle East | 47.36 | 134.30 | 180.19 | 381.23 | 2.84 | 2.12 |
| Thailand | North Africa and Middle East | 4623.85 | 10644.55 | 12386.14 | 15258.45 | 2.30 | 1.23 |
| Timor-Leste | Central Asia | 34.53 | 104.01 | 102.59 | 343.41 | 3.01 | 3.35 |
| Togo | Eastern Sub-Saharan Africa | 51.86 | 199.29 | 214.91 | 639.34 | 3.84 | 2.97 |
| Tokelau | Eastern Europe | 0.09 | 0.13 | 0.23 | 0.28 | 1.52 | 1.18 |
| Tonga | North Africa and Middle East | 7.42 | 11.76 | 22.46 | 27.61 | 1.58 | 1.23 |
| Trinidad and Tobago | Western Europe | 55.91 | 93.60 | 125.93 | 141.83 | 1.67 | 1.13 |
| Tunisia | High-income North America | 526.02 | 1109.63 | 1337.83 | 1671.39 | 2.11 | 1.25 |
| Turkey | Southern Latin America | 3619.69 | 7648.93 | 9363.37 | 13179.81 | 2.11 | 1.41 |
| Turkmenistan | Central Asia | 45.65 | 99.09 | 152.76 | 228.49 | 2.17 | 1.50 |
| Tuvalu | Oceania | 0.57 | 1.07 | 1.26 | 2.51 | 1.89 | 2.00 |
| Uganda | Central Latin America | 294.62 | 975.68 | 1265.32 | 3907.72 | 3.31 | 3.09 |
| Ukraine | Southeast Asia | 375.98 | 409.55 | 1225.40 | 964.83 | 1.09 | 0.79 |
| United Arab Emirates | Caribbean | 111.72 | 720.53 | 204.70 | 811.15 | 6.45 | 3.96 |
| United Kingdom of Great Britain and Northern Ireland | North Africa and Middle East | 7174.34 | 9613.84 | 12263.34 | 14508.92 | 1.34 | 1.18 |
| United Republic of Tanzania | Eastern Sub-Saharan Africa | 540.46 | 1592.05 | 2210.65 | 5735.22 | 2.95 | 2.59 |
| United States of America | Southern sub-Saharan Africa | 34472.06 | 41009.05 | 82541.33 | 112443.80 | 1.19 | 1.36 |
| United States Virgin Islands | Western Europe | 7.82 | 8.01 | 15.09 | 12.25 | 1.02 | 0.81 |
| Uruguay | Western Europe | 139.12 | 269.84 | 416.47 | 696.65 | 1.94 | 1.67 |
| Uzbekistan | Caribbean | 255.55 | 714.45 | 868.15 | 1677.34 | 2.80 | 1.93 |
| Vanuatu | Oceania | 7.34 | 23.18 | 21.59 | 55.68 | 3.16 | 2.58 |
| Bolivarian Republic of Venezuela | Oceania | 1499.76 | 2974.69 | 3134.36 | 4554.08 | 1.98 | 1.45 |
| Socialist Republic of Viet Nam | Oceania | 2846.72 | 9376.41 | 9818.99 | 16396.88 | 3.29 | 1.67 |
| Yemen | Oceania | 455.79 | 1641.06 | 1401.25 | 4472.00 | 3.60 | 3.19 |
| Zambia | Oceania | 191.47 | 595.11 | 815.91 | 2174.85 | 3.11 | 2.67 |
| Zimbabwe | Oceania | 267.60 | 483.80 | 1084.42 | 1648.04 | 1.81 | 1.52 |
